# Supplementary material for: Analysis of Pericardial Effusion from Idiopathic Pericarditis Patients by Two-Dimensional Gel Electrophoresis
Source: Hindawi journal article supplement (doi:10.1155/2014/942718), 2014-01-01
Supplement: f1 [file 942718.f1.pdf]

**Supplementary Table 1: Information on MS/MS database search**

|                                                                                    |                                                                                                                                                                                                   |
|------------------------------------------------------------------------------------|---------------------------------------------------------------------------------------------------------------------------------------------------------------------------------------------------|
| <b>Information on MS/MS database search:</b>                                       |                                                                                                                                                                                                   |
| a. Name of peaklist-generating software and release version (number or date)       | GPS Explorer™ v3.6                                                                                                                                                                                |
| b. Parameters used – default vs altered                                            | n/a                                                                                                                                                                                               |
| c. Name of the search engine and release version (number or date)                  | MASCOT 2.0 (Matrix Science)                                                                                                                                                                       |
|                                                                                    |                                                                                                                                                                                                   |
| Search Parameters:                                                                 |                                                                                                                                                                                                   |
|                                                                                    |                                                                                                                                                                                                   |
| d. Enzyme specificity considered                                                   | Trypsin                                                                                                                                                                                           |
| e. # of missed cleavages permitted                                                 | 1                                                                                                                                                                                                 |
| f. Variable modifications (including residue specificity)                          | Carbamidomethylation of cysteine, oxidation of methionine/histidine/tryptophan, phosphorylation of serine/threonine/tyrosine, acetylation of lysine, and methylation of histidine/lysine/arginine |
| g. Mass tolerance for precursor ions                                               | 50 ppm                                                                                                                                                                                            |
| h. Mass tolerance for fragment ions                                                | 0.4 Da                                                                                                                                                                                            |
| i. Name of database searched and release version/date                              | nr NCBI or Swiss-Prot (automatically updated to most current version)                                                                                                                             |
| j. Species restriction and justification for searching only a subset of a database | <i>Homo sapiens</i>                                                                                                                                                                               |

|                                                                           |                                 |
|---------------------------------------------------------------------------|---------------------------------|
| l. Cut-off score/expectation value for accepting individual MS/MS spectra | S/N cutoff: 20                  |
| m. Justification of the threshold employed                                | noise is generally less than 5% |
