# Supplementary material for: Analysis of Pericardial Effusion from Idiopathic Pericarditis Patients by Two-Dimensional Gel Electrophoresis
Source: Biomed Res Int. 2014 Apr 2;2014:942718. doi: 10.1155/2014/942718 (PMC3996951; doi:10.1155/2014/942718)
Supplement: Supplementary file 2 [file 942718.f2.xlsx]

## Sheet: Sayfa1
	Supplementary Table 2: The list of identified proteins and identification scores in MALDI TOF/TOF analysis.
Supplementary Material 1	NCBI
Spot Label	Protein Name	NCBI Accession No.	Protein MW	Protein PI	Pep.Count	Protein Score	Protein Score C. I. %	Total Ion Score	Total Ion C. I. %
A1	intelectin-1 precursor [Homo sapiens]	gi|31542986	34939.3	5.66	4	226	100	214	100
A2	immunoglobulin heavy chain variable region [Homo	gi|112700722	11216.5	8.87	4	43	0
A3	intelectin 1 (galactofuranose binding), isoform CRA_a [Homo sapiens]	gi|119573073	26787.5	6.15	3	154	100	139	100
B1	immunoglobulin light chain [Homo sapiens]	gi|149673887	23379.6	6.97	7	287	100	244	100
B2	hypothetical protein [Homo sapiens]	gi|34365168	51066.2	7.85	7	63	87.483	35	65.251
B3	PRO2675 [Homo sapiens]	gi|7770217	32553.4	6.14	9	95	99.992	56	99.774
B4	Ig gamma 2 H chain, BUR [human, Peptide Mutant, 348 aa]	gi|243169	38698.4	6.22	6	69	96.997	46	97.368
B5	Chain L, Bha10 Igg1 Wild-Type Fab - Antibody Directed At Human Ltbr	gi|255311885	23226.4	7.79	8	238	100	186	100
B6	hemopexin precursor [Homo sapiens]	gi|386789	51512.2	6.57	6	58	59.495	42	94.697
B7	immunoglobulin heavy chain constant region gamma 4 [Homo sapiens]	gi|12054078	36091.9	7.16	3	137	100	128	100
B8	Chain A, Crystal Structure Of A Human Igm Rheumatoid Factor Fab In Complex With Its Autoantigen Igg	gi|3659940	23442.7	7.34	3	108	100	96	100
B9	immunoglobulin heavy chain constant region gamma 4 [Homo sapiens]	gi|12054078	36091.9	7.16	2	100	99.998	94	100
B10	Chain A, Crystal Structure Of The Ga Module Complexed With Human Serum Albumin	gi|55669910	65178.2	5.57	26	722	100	569	100
B11	HPX protein [Homo sapiens]	gi|13529281	28612	6.45	7	145	100	112	100
C1	PRO2675 [Homo sapiens]	gi|7770217	32553.4	6.14	12	326	100	262	100
C2	Chain A, Structure Of Human Serum Albumin With S-Naproxen And The Ga Module	gi|168988718	65777.6	5.63	27	817	100	648	100
C3	hemopexin precursor [Homo sapiens]	gi|11321561	51643.3	6.55	14	508	100	430	100
C4	recombinant IgG4 heavy chain [Homo sapiens]	gi|9857759	42894.8	5.72	7	136	100	110	100
C5	Beta-2-glycoprotein I apolipoprotein H [Homo sapiens]	gi|28810	38286.7	8.34	8	239	100	207	100
C6	alloalbumin Venezia [Homo sapiens]	gi|178345	69181.4	5.99	26	731	100	593	100
C7	Chain L, Crystal Structure Of A Glycosylated Fab From An Igm Cryoglobulin With Properties Of A Natu	gi|99031801	23330.5	6.2	7	322	100	276	100
C8	Chain A, Crystal Structure Of A Human Fc Fragment Engineered For Extended Serum Half-Life	gi|225734126	23720.9	6.66	6	87	99.952	55	99.671
C9	hemopexin precursor [Homo sapiens]	gi|11321561	51643.3	6.55	11	237	100	186	100
C10	immunoglobulin light chain [Homo sapiens]	gi|149673887	23379.6	6.97	5	98	99.996	52	98.91
C12	keratin 1 [Homo sapiens]	gi|7331218	65978	8.16	18	452	100	358	100
D1	hypothetical protein [Homo sapiens]	gi|34365168	51066.2	7.85	9	118	100	79	99.999
D2	immunoglobulin light chain [Homo sapiens]	gi|149673887	23379.6	6.97	8	500	100	447	100
D3	epidermal cytokeratin 2 [Homo sapiens]	gi|181402	65825.4	8.07	13	119	100	65	99.973
D4	Chain L, Crystal Structure Of A Glycosylated Fab From An Igm Cryoglobulin With Properties Of A Natu	gi|99031801	23330.5	6.2	7	351	100	308	100
D5	immunoglobulin light chain [Homo sapiens]	gi|149673887	23379.6	6.97	8	484	100	431	100
D6	serotransferrin precursor [Homo sapiens]	gi|4557871	76999.6	6.81	32	971	100	759	100
D7	immunoglobulin light chain [Homo sapiens]	gi|149673887	23379.6	6.97	11	572	100	487	100
D8	serotransferrin precursor [Homo sapiens]	gi|4557871	76999.6	6.81	30	1070	100	887	100
