# Supplementary material for: Analysis of Pericardial Effusion from Idiopathic Pericarditis Patients by Two-Dimensional Gel Electrophoresis
Source: Biomed Res Int. 2014 Apr 2;2014:942718. doi: 10.1155/2014/942718 (PMC3996951; doi:10.1155/2014/942718)
Supplement: Supplementary file 3 [file 942718.f3.xlsx]

## Sheet: Sayfa1
Supplementary Table 3: The list of identified peptide sequences by MALDI TOF/TOF analysis
Supplementary Material 2
Analysis Information
	Report Type			Protein-Peptide Summary by Spot						Analysis Type			Combined (MS+MS/MS)
	Sample Set Name			MUKA110321						Database			NCBInr
	Analysis Name			human						Creation Date
	Reported By									Last Modified
		MS Acq. : Proc. Methods
		Interpretation Method
Gel Idx/Pos			52/C1						Instr./Gel Origin		BA2060/110322A					Process Status		Analysis Succeeded
Plate [#] Name			[1] 22987						Instrument Sample Name							Spectra		11
Rank		Protein Name						Species				Accession No.		Protein MW	Protein	Pep.		Protein	Protein	Total Ion	Total Ion
															PI	Count		Score	Score	Score	C. I. %
																			C. I. %
	1	intelectin-1 precursor [Homo sapiens]										gi|31542986		34939.3	5.66	4	226		100	214	100
		Peptide Information
		Calc. Mass		Obsrv. Mass	± da	± ppm	Start	End	Sequence			Ion	C. I. %	Modification					Rank	Result Type
							Seq.	Seq.				Score
		1201.6	1201.54		-0.0625	-52	230	239	EFTAGFVQFR			74	99.996							Mascot
		1201.6	1201.54		-0.0625	-52	230	239	EFTAGFVQFR											Mascot
		1292.59	1292.52		-0.0663	-51	219	229	TASYYSPYGQR											Mascot
		1292.59	1292.52		-0.0663	-51	219	229	TASYYSPYGQR			37	83.626							Mascot
		1424.78	1424.7		-0.0736	-52	302	313	EITEAAVLLFYR											Mascot
		1424.78	1424.7		-0.0736	-52	302	313	EITEAAVLLFYR			102	100							Mascot
		2059.98	2059.87		-0.1071	-52	43	59	EIKDECPSAFDGLYFLR					Carbamidomethyl (C)[6]						Mascot
	2	intelectin 1 (galactofuranose binding), isoform CRA_a										gi|119573073		26787.5	6.15	3	224		100	214	100
		[Homo sapiens]
		Peptide Information
		Calc. Mass		Obsrv. Mass	± da	± ppm	Start	End	Sequence			Ion	C. I. %	Modification					Rank	Result Type
							Seq.	Seq.				Score
		1201.6	1201.54		-0.0625	-52	159	168	EFTAGFVQFR			74	99.996							Mascot
		1201.6	1201.54		-0.0625	-52	159	168	EFTAGFVQFR											Mascot
		1292.59	1292.52		-0.0663	-51	148	158	TASYYSPYGQR											Mascot
		1292.59	1292.52		-0.0663	-51	148	158	TASYYSPYGQR			37	83.626							Mascot
		1424.78	1424.7		-0.0736	-52	231	242	EITEAAVLLFYR											Mascot
		1424.78	1424.7		-0.0736	-52	231	242	EITEAAVLLFYR			102	100							Mascot
	3	Intelectin 2 [Homo sapiens]										gi|109658772		36098.1	8.49	4	149		100	140	100
		Peptide Information
		Calc. Mass		Obsrv. Mass	± da	± ppm	Start	End	Sequence			Ion	C. I. %	Modification					Rank	Result Type
							Seq.	Seq.				Score
		1124.59	1124.55		-0.0409	-36	2	10	LSMLRTMTR					Oxidation (M)[3]						Mascot
		1292.59	1292.52		-0.0663	-51	230	240	TASYYSPYGQR											Mascot
		1292.59	1292.52		-0.0663	-51	230	240	TASYYSPYGQR			37	83.626							Mascot
		1424.78	1424.7		-0.0736	-52	313	324	EITEAAVLLFYR											Mascot
		1424.78	1424.7		-0.0736	-52	313	324	EITEAAVLLFYR			102	100							Mascot
		2207.17	2206.99		-0.1807	-82	182	200	TNTGFLQRLGHNLFGIYQ											Mascot
									K
	4	intelectin [Homo sapiens]										gi|37724005		34880.2	5.51	3	120		100	111	100
		Peptide Information
		Calc. Mass		Obsrv. Mass	± da	± ppm	Start	End	Sequence			Ion	C. I. %	Modification					Rank	Result Type
							Seq.	Seq.				Score
		1201.6	1201.54		-0.0625	-52	230	239	EFTAGFVQFR			74	99.996							Mascot
		1201.6	1201.54		-0.0625	-52	230	239	EFTAGFVQFR											Mascot
		1292.59	1292.52		-0.0663	-51	219	229	TASYYSPYGQR											Mascot
		1292.59	1292.52		-0.0663	-51	219	229	TASYYSPYGQR			37	83.626							Mascot
		2059.98	2059.87		-0.1071	-52	43	59	EIKDECPSAFDGLYFLR					Carbamidomethyl (C)[6]						Mascot
	5	T-cell receptor V delta 1-C alpha region - human										gi|478022		8935.5	5.21	7	66		94.009
		(fragment)
		Peptide Information
		Calc. Mass		Obsrv. Mass	± da	± ppm	Start	End	Sequence			Ion	C. I. %	Modification					Rank	Result Type
							Seq.	Seq.				Score
		850.478	850.492		0.0134	16	54	61	IIFGSGTR											Mascot
		996.472	996.537		0.065	65	12	18	WSLFCQR					Carbamidomethyl (C)[5]						Mascot
		996.472	996.537		0.065	65	12	18	WSLFCQR					Carbamidomethyl (C)[5]						Mascot
		1124.57	1124.55		-0.0164	-15	11	18	KWSLFCQR					Carbamidomethyl (C)[6]						Mascot
		1151.58	1151.65		0.0763	66	1	10	SPGFLLTECK					Carbamidomethyl (C)[9]						Mascot
		1279.67	1279.69		0.0151	12	1	11	SPGFLLTECKK					Carbamidomethyl (C)[9]						Mascot
		1490.68	1490.61		-0.0692	-46	40	53	YFCALGELDSSASK											Mascot
		2296.2	2296.04		-0.1594	-69	62	81	LSIRPNIQNPDPAVYQLR											Mascot
									DS
	6	peptide methionine sulfoxide reductase [Homo sapiens]										gi|9963779		25645.4	8.22	5	52		0	29	0
		Peptide Information
		Calc. Mass		Obsrv. Mass	± da	± ppm	Start	End	Sequence			Ion	C. I. %	Modification					Rank	Result Type
							Seq.	Seq.				Score
		850.456	850.492		0.0352	41	1	7	MLSATRR					Oxidation (M)[1]						Mascot
		868.463	868.497		0.0337	39	110	117	TGHAEVVR											Mascot
		1424.75	1424.7		-0.042	-29	8	19	ACQLHSLFPVPR					Carbamidomethyl (C)[2]						Mascot
		1424.75	1424.7		-0.042	-29	8	19	ACQLHSLFPVPR			29	0	Carbamidomethyl (C)[2]						Mascot
		2663.17	2663.24		0.0715	27	54	77	TVEPFPEGTQMAVFGMG					Oxidation (M)[11]						Mascot
									CFWGAER
		2679.17	2679.24		0.0744	28	54	77	TVEPFPEGTQMAVFGMG					Oxidation (M)[11,16]						Mascot
									CFWGAER
		2807.26	2807.18		-0.0821	-29	54	78	TVEPFPEGTQMAVFGMG					Oxidation (M)[11,16]						Mascot
									CFWGAERK
	7	adipophilin [Homo sapiens]										gi|1806040		48070.4	6.28	9	41		0
		Peptide Information
		Calc. Mass		Obsrv. Mass	± da	± ppm	Start	End	Sequence			Ion	C. I. %	Modification					Rank	Result Type
							Seq.	Seq.				Score
		848.466	848.479		0.0132	16	376	382	GQLQKMK					Oxidation (M)[6]						Mascot
		1051.55	1051.65		0.0973	93	265	273	KNVYSANQK											Mascot
		1165.59	1165.67		0.0779	67	365	375	EVSDSLLTSSK											Mascot
		1165.59	1165.67		0.0779	67	365	375	EVSDSLLTSSK											Mascot
		1520.78	1520.59		-0.192	-126	72	85	LEPQIAVANTYACK											Mascot
		1639.8	1639.7		-0.1052	-64	168	182	MMQLVSSGVENALTK					Oxidation (M)[1,2]						Mascot
		1639.8	1639.85		0.0473	29	168	182	MMQLVSSGVENALTK					Oxidation (M)[1,2]						Mascot
		2233.05	2232.97		-0.0827	-37	345	364	HMGVMAGDIYSVFRNAA					Oxidation (M)[2,5]						Mascot
									SFK
		2245.89	2246.08		0.1873	83	291	309	SIGYDDTDESHCAEQFES					Carbamidomethyl (C)[12]						Mascot
									R
		3175.71	3175.48		-0.2351	-74	56	85	TITSVAMTSALPIIQKLEP											Mascot
									QIAVANTYACK
		3175.71	3175.48		-0.2351	-74	56	85	TITSVAMTSALPIIQKLEP											Mascot
									QIAVANTYACK
		3794.99	3794.67		-0.3205	-84	2	37	ASVAVDPQPSVVTRVVN											Mascot
									LPLVSSTYDLMSSAYLST
									K
	8	cystic fibrosis transmembrane conductance regulator										gi|47776190		3674.8	4.75	2	40		0	22	0
		[Homo sapiens]
		Peptide Information
		Calc. Mass		Obsrv. Mass	± da	± ppm	Start	End	Sequence			Ion	C. I. %	Modification					Rank	Result Type
							Seq.	Seq.				Score
		1201.67	1201.54		-0.1352	-113	1	10	KVFIFSGTFR			24	0							Mascot
		1201.67	1201.54		-0.1352	-113	2	11	VFIFSGTFRK											Mascot
	9	constitutive androstane receptor SV1 [Homo sapiens]										gi|48869128		36563.7	8.73	9	40		0
		Peptide Information
		Calc. Mass		Obsrv. Mass	± da	± ppm	Start	End	Sequence			Ion	C. I. %	Modification					Rank	Result Type
							Seq.	Seq.				Score
		842.387	842.466		0.0784	93	61	67	RHCPACR											Mascot
		868.5	868.497		-0.0028	-3	116	123	TLLGAHTR											Mascot
		1106.53	1106.48		-0.0493	-45	1	9	MASREDELR											Mascot
		1639.75	1639.7		-0.0476	-29	42	57	SIGPTCPFAGSCEVSK					Carbamidomethyl (C)[6]						Mascot
		1639.75	1639.85		0.1049	64	42	57	SIGPTCPFAGSCEVSK					Carbamidomethyl (C)[6]						Mascot
		2083.18	2082.88		-0.2969	-143	178	195	DLPVFRSLPIEDQISLLK											Mascot
		2283.11	2283.05		-0.0572	-25	284	302	DEIDQLQEEMALTLQSYI					Oxidation (M)[10]						Mascot
									K
		2417.31	2417.14		-0.1745	-72	232	251	VGFQVEFLELLFHFHGTL											Mascot
									RK
		2417.31	2417.14		-0.1745	-72	232	251	VGFQVEFLELLFHFHGTL											Mascot
									RK
		2661.09	2661.22		0.1299	49	10	32	NCVVCGDQATGYHFNAL					Carbamidomethyl (C)[2,5,19,22]						Mascot
									TCEGCK
		3175.59	3175.48		-0.1097	-35	196	223	GAAVEICHIVLNTTFCLQT					Carbamidomethyl (C)[7,16]						Mascot
									QNFLCGPLR
		3175.59	3175.48		-0.1097	-35	196	223	GAAVEICHIVLNTTFCLQT					Carbamidomethyl (C)[7,16]						Mascot
									QNFLCGPLR
	10	unnamed protein product [Homo sapiens]										gi|194376194		27664.9	6.72	4	39		0	25	0
		Peptide Information
		Calc. Mass		Obsrv. Mass	± da	± ppm	Start	End	Sequence			Ion	C. I. %	Modification					Rank	Result Type
							Seq.	Seq.				Score
		864.457	864.504		0.0467	54	177	183	FQLVDSR											Mascot
		1045.56	1045.51		-0.0519	-50	1	8	MVHQVLYR											Mascot
		1292.67	1292.52		-0.1462	-113	177	187	FQLVDSRSQGR											Mascot
		1292.67	1292.52		-0.1462	-113	177	187	FQLVDSRSQGR			25	0							Mascot
		1520.77	1520.59		-0.1875	-123	112	122	VWWMFRVFGHR											Mascot
Gel Idx/Pos			188/H4						Instr./Gel Origin		AB4700/110302A					Process Status		Analysis Succeeded
Plate [#] Name			[1] 8907						Instrument Sample Name							Spectra		11
Rank		Protein Name						Species				Accession No.		Protein MW	Protein	Pep.		Protein	Protein	Total Ion	Total Ion
															PI	Count		Score	Score	Score	C. I. %
																			C. I. %
	1	immunoglobulin heavy chain variable region [Homo										gi|112700722		11216.5	8.87	4	43		0
		sapiens]
		Peptide Information
		Calc. Mass		Obsrv. Mass	± da	± ppm	Start	End	Sequence			Ion	C. I. %	Modification					Rank	Result Type
							Seq.	Seq.				Score
		996.518	996.62		0.1015	102	83	90	NTVYLQMK											Mascot
		996.518	996.62		0.1015	102	83	90	NTVYLQMK											Mascot
		1493.73	1493.79		0.0579	39	34	46	NYGMSWVRQAPGK											Mascot
		2283.18	2283.25		0.0745	33	1	22	VQCEVQLLESGGGLVQP					Carbamidomethyl (C)[3]						Mascot
									GGSLR
		3338.69	3338.88		0.1892	57	1	33	VQCEVQLLESGGGLVQP											Mascot
									GGSLRLSCAASGFTFK
		3338.69	3338.88		0.1892	57	1	33	VQCEVQLLESGGGLVQP											Mascot
									GGSLRLSCAASGFTFK
	2	immunoglobulin epsilon heavy chain variable region										gi|74146413		13281.3	8.04	4	40		0
		[Homo sapiens]
		Peptide Information
		Calc. Mass		Obsrv. Mass	± da	± ppm	Start	End	Sequence			Ion	C. I. %	Modification					Rank	Result Type
							Seq.	Seq.				Score
		1286.7	1286.72		0.0205	16	1	12	EVQLVQSGAEVK											Mascot
		1286.7	1286.72		0.0205	16	1	12	EVQLVQSGAEVK											Mascot
		1920.87	1921		0.1306	68	68	84	VTMTTDTSTNTAYMDLR											Mascot
		1920.87	1921		0.1306	68	68	84	VTMTTDTSTNTAYMDLR											Mascot
		2283.11	2283.25		0.1455	64	20	38	VSCMASGYTFSIYRISWV					Carbamidomethyl (C)[3]						Mascot
									R
		2284.1	2284.25		0.1477	65	99	120	TTRGGNSGFDIWGQGTM											Mascot
									IIVSS
		2284.1	2284.25		0.1477	65	99	120	TTRGGNSGFDIWGQGTM											Mascot
									IIVSS
		2300.1	2300.25		0.1562	68	99	120	TTRGGNSGFDIWGQGTM					Oxidation (M)[17]						Mascot
									IIVSS
	3	Chain X, Structure Of Human Rev7 In Complex With A										gi|288965387		5622.8	6.54	3	39		0
		Human Rev3 Fragment In A Monoclinic Crystal
		Peptide Information
		Calc. Mass		Obsrv. Mass	± da	± ppm	Start	End	Sequence			Ion	C. I. %	Modification					Rank	Result Type
							Seq.	Seq.				Score
		1286.59	1286.72		0.1222	95	42	52	EEIMATLLDHD											Mascot
		1286.59	1286.72		0.1222	95	42	52	EEIMATLLDHD											Mascot
		2284.22	2284.25		0.0271	12	21	41	NGSFTPRTANILKPLMSP											Mascot
									PSR
		2284.22	2284.25		0.0271	12	21	41	NGSFTPRTANILKPLMSP											Mascot
									PSR
		2300.22	2300.25		0.0359	16	21	41	NGSFTPRTANILKPLMSP					Oxidation (M)[16]						Mascot
									PSR
		2808.43	2808.41		-0.0183	-7	28	52	TANILKPLMSPPSREEIM					Oxidation (M)[9]						Mascot
									ATLLDHD
	4	Chain A, Oligomeric Structure Of The Dusp Domain Of										gi|291463673		15500.7	4.99	4	37		0
		Human Usp15
		Peptide Information
		Calc. Mass		Obsrv. Mass	± da	± ppm	Start	End	Sequence			Ion	C. I. %	Modification					Rank	Result Type
							Seq.	Seq.				Score
		1211.57	1211.58		0.0102	8	29	38	GDTWYLVDSR											Mascot
		1494.65	1494.78		0.1322	88	1	15	GSMAEGGAADLDTQR					Oxidation (M)[3]						Mascot
		1494.65	1494.78		0.1322	88	1	15	GSMAEGGAADLDTQR					Oxidation (M)[3]						Mascot
		2225.05	2225.19		0.1382	62	55	74	YQMGDQNVYPGPIDNSG					Oxidation (M)[3]						Mascot
									LLK
		2225.05	2225.19		0.1382	62	55	74	YQMGDQNVYPGPIDNSG					Oxidation (M)[3]						Mascot
									LLK
		2298.17	2298.27		0.1072	47	83	101	EHLIDELDYILLPTEGWNK											Mascot
	5	Chain A, Gdp-Bound Rab2a Gtpase										gi|73535753		19682.1	6.49	4	34		0
		Peptide Information
		Calc. Mass		Obsrv. Mass	± da	± ppm	Start	End	Sequence			Ion	C. I. %	Modification					Rank	Result Type
							Seq.	Seq.				Score
		1045.54	1045.6		0.0547	52	74	81	SITRSYYR											Mascot
		1286.68	1286.72		0.0377	29	1	12	GPLGSAYAYLFK											Mascot
		1286.68	1286.72		0.0377	29	1	12	GPLGSAYAYLFK											Mascot
		1494.74	1494.78		0.0377	25	156	169	TASNVEEAFINTAK											Mascot
		1494.74	1494.78		0.0377	25	156	169	TASNVEEAFINTAK											Mascot
		2284.23	2284.25		0.0246	11	13	33	YIIIGDTGVGKSCLLLQFT											Mascot
									DK
		2284.23	2284.25		0.0246	11	13	33	YIIIGDTGVGKSCLLLQFT											Mascot
									DK
	6	zinc finger CCCH-type, antiviral 1, isoform CRA_c										gi|119604310		42087.8	8.9	5	33		0
		[Homo sapiens]
		Peptide Information
		Calc. Mass		Obsrv. Mass	± da	± ppm	Start	End	Sequence			Ion	C. I. %	Modification					Rank	Result Type
							Seq.	Seq.				Score
		1211.55	1211.58		0.0246	20	39	48	VMSCDSFPIR					Carbamidomethyl (C)[4]						Mascot
		1921.01	1921		-0.0094	-5	189	203	YKLSEIHHLHPEYVR											Mascot
		1921.01	1921		-0.0094	-5	189	203	YKLSEIHHLHPEYVR											Mascot
		2211.13	2211.18		0.0451	20	291	310	NCPYDAKNVVMFVAQVL					Oxidation (M)[11]						Mascot
									VGK
		2225.06	2225.19		0.1306	59	1	18	MLIGKTWTDFEHMETIEK					Oxidation (M)[1]						Mascot
		2225.06	2225.19		0.1306	59	1	18	MLIGKTWTDFEHMETIEK					Oxidation (M)[1]						Mascot
		3338.61	3338.88		0.2651	79	158	187	GPDHQPAKTSSVSLTATF					Carbamidomethyl (C)[25]						Mascot
									RPQEDFCFLSSK
		3338.61	3338.88		0.2651	79	158	187	GPDHQPAKTSSVSLTATF					Carbamidomethyl (C)[25]						Mascot
									RPQEDFCFLSSK
	7	complement C8-beta propetide /map='1p36.2- p22.1'										gi|29575		62007.9	8.24	7	32		0
		/hgml_locus_uid='LE0166P' [Homo sapiens]
		Peptide Information
		Calc. Mass		Obsrv. Mass	± da	± ppm	Start	End	Sequence			Ion	C. I. %	Modification					Rank	Result Type
							Seq.	Seq.				Score
		1045.58	1045.6		0.0149	14	357	365	CRGILNEIK											Mascot
		1493.74	1493.79		0.048	32	441	452	QNMKQALEEFQK											Mascot
		1920.95	1921		0.0494	26	278	292	LPLEYSYGEYRDLFR											Mascot
		1920.95	1921		0.0494	26	278	292	LPLEYSYGEYRDLFR											Mascot
		2297.98	2298.27		0.2911	127	495	514	NTPIDGKWNCWSNWSS											Mascot
									CSGR
		2401.09	2401.36		0.2671	111	40	59	YAYLLQPSQFHGEPCNF					Carbamidomethyl (C)[15]						Mascot
									SDK
		2401.09	2401.36		0.2671	111	40	59	YAYLLQPSQFHGEPCNF					Carbamidomethyl (C)[15]						Mascot
									SDK
		2663.23	2663.48		0.2451	92	38	59	YRYAYLLQPSQFHGEPC											Mascot
									NFSDK
		2915.21	2915.61		0.4009	138	519	545	QRQCNNPPPQNGGSPC					Carbamidomethyl (C)[4,16,26]						Mascot
									SGPASETLDCS
	8	PRO2163 [Homo sapiens]										gi|7770165		37152.4	9.89	5	32		0
		Peptide Information
		Calc. Mass		Obsrv. Mass	± da	± ppm	Start	End	Sequence			Ion	C. I. %	Modification					Rank	Result Type
							Seq.	Seq.				Score
		1920.93	1921		0.0718	37	25	41	LQSQRPSMASELMPSSR					Oxidation (M)[8]						Mascot
		1920.93	1921		0.0718	37	25	41	LQSQRPSMASELMPSSR					Oxidation (M)[8]						Mascot
		2211.08	2211.18		0.0991	45	52	71	CLLYCNGVLEPLYLCPNG											Mascot
									AR
		2283.21	2283.25		0.0359	16	183	203	TAVAQGGWRSLWLGWG											Mascot
									PTALR
		2663.37	2663.48		0.1076	40	220	244	SWLNGLRPKDQTSVGMS											Mascot
									FVAGGISR
		2915.44	2915.61		0.1721	59	25	49	LQSQRPSMASELMPSSR					Oxidation (M)[8,13]						Mascot
									LWSLSYTK
	9	aspartyl-tRNA synthetase variant [Homo sapiens]										gi|62896511		57109	6.15	6	32		0
		Peptide Information
		Calc. Mass		Obsrv. Mass	± da	± ppm	Start	End	Sequence			Ion	C. I. %	Modification					Rank	Result Type
							Seq.	Seq.				Score
		996.511	996.62		0.1088	109	189	197	TSTSQAVFR											Mascot
		996.511	996.62		0.1088	109	189	197	TSTSQAVFR											Mascot
		1279.68	1279.81		0.1226	96	100	110	QMVKFAANINK					Oxidation (M)[2]						Mascot
		2211.12	2211.18		0.0563	25	123	141	VNQKIGSCTQQDVELHV					Carbamidomethyl (C)[8]						Mascot
									QK
		2225.15	2225.19		0.0466	21	339	356	FLEPTLRLEYCEALAMLR					Carbamidomethyl (C)[11]						Mascot
		2225.15	2225.19		0.0466	21	339	356	FLEPTLRLEYCEALAMLR					Carbamidomethyl (C)[11]						Mascot
		2231.16	2231.28		0.1232	55	29	47	YGISSMIQSHEKPDRVLV					Oxidation (M)[6]						Mascot
									R
		2808.28	2808.41		0.1299	46	242	264	NNAYLAQSPQLYKQMCI					Carbamidomethyl (C)[16,18], Oxidation						Mascot
									CADFEK					(M)[15]
	10	spectrin repeat containing, nuclear envelope 1, isoform										gi|119568119		55474.3	5.72	6	32		0
		CRA_h [Homo sapiens]
		Peptide Information
		Calc. Mass		Obsrv. Mass	± da	± ppm	Start	End	Sequence			Ion	C. I. %	Modification					Rank	Result Type
							Seq.	Seq.				Score
		1051.6	1051.74		0.1382	131	329	337	EKVHVIGNR											Mascot
		1279.62	1279.81		0.1814	142	1	11	MIPESPEAYVK					Oxidation (M)[1]						Mascot
		1286.71	1286.72		0.0053	4	117	127	WELLQAQALSK											Mascot
		1286.71	1286.72		0.0053	4	117	127	WELLQAQALSK											Mascot
		1493.76	1493.79		0.0269	18	72	85	LLGECSSSIDSVKR											Mascot
		2284.15	2284.25		0.0974	43	12	32	LTENAIKNTSGDHSALES											Mascot
									QIR
		2284.15	2284.25		0.0974	43	12	32	LTENAIKNTSGDHSALES											Mascot
									QIR
		2300.15	2300.25		0.1023	44	270	289	NEIVPIDSNLDAEILQDHH											Mascot
									K
Gel Idx/Pos			169/G18						Instr./Gel Origin		AB4700/110302A					Process Status		Analysis Succeeded
Plate [#] Name			[1] 8907						Instrument Sample Name							Spectra		11
Rank		Protein Name						Species				Accession No.		Protein MW	Protein	Pep.		Protein	Protein	Total Ion	Total Ion
															PI	Count		Score	Score	Score	C. I. %
																			C. I. %
	1	intelectin 1 (galactofuranose binding), isoform CRA_a										gi|119573073		26787.5	6.15	3	154		100	139	100
		[Homo sapiens]
		Peptide Information
		Calc. Mass		Obsrv. Mass	± da	± ppm	Start	End	Sequence			Ion	C. I. %	Modification					Rank	Result Type
							Seq.	Seq.				Score
		1201.6	1201.71		0.1096	91	159	168	EFTAGFVQFR											Mascot
		1201.6	1201.71		0.1096	91	159	168	EFTAGFVQFR			59	99.862							Mascot
		1292.59	1292.71		0.1175	91	148	158	TASYYSPYGQR											Mascot
		1292.59	1292.71		0.1175	91	148	158	TASYYSPYGQR			19	0							Mascot
		1424.78	1424.91		0.1286	90	231	242	EITEAAVLLFYR											Mascot
		1424.78	1424.91		0.1286	90	231	242	EITEAAVLLFYR			61	99.913							Mascot
	2	intelectin-1 precursor [Homo sapiens]										gi|31542986		34939.3	5.66	3	152		100	139	100
		Peptide Information
		Calc. Mass		Obsrv. Mass	± da	± ppm	Start	End	Sequence			Ion	C. I. %	Modification					Rank	Result Type
							Seq.	Seq.				Score
		1201.6	1201.71		0.1096	91	230	239	EFTAGFVQFR											Mascot
		1201.6	1201.71		0.1096	91	230	239	EFTAGFVQFR			59	99.862							Mascot
		1292.59	1292.71		0.1175	91	219	229	TASYYSPYGQR											Mascot
		1292.59	1292.71		0.1175	91	219	229	TASYYSPYGQR			19	0							Mascot
		1424.78	1424.91		0.1286	90	302	313	EITEAAVLLFYR											Mascot
		1424.78	1424.91		0.1286	90	302	313	EITEAAVLLFYR			61	99.913							Mascot
	3	intelectin-2 precursor [Homo sapiens]										gi|18254480		36188.2	8.61	2	87		99.957	80	99.999
		Peptide Information
		Calc. Mass		Obsrv. Mass	± da	± ppm	Start	End	Sequence			Ion	C. I. %	Modification					Rank	Result Type
							Seq.	Seq.				Score
		1292.59	1292.71		0.1175	91	231	241	TASYYSPYGQR											Mascot
		1292.59	1292.71		0.1175	91	231	241	TASYYSPYGQR			19	0							Mascot
		1424.78	1424.91		0.1286	90	314	325	EITEAAVLLFYR											Mascot
		1424.78	1424.91		0.1286	90	314	325	EITEAAVLLFYR			61	99.913							Mascot
	4	intelectin 1 (galactofuranose binding), isoform CRA_b										gi|119573074		32960.8	6.58	2	86		99.939	78	99.998
		[Homo sapiens]
		Peptide Information
		Calc. Mass		Obsrv. Mass	± da	± ppm	Start	End	Sequence			Ion	C. I. %	Modification					Rank	Result Type
							Seq.	Seq.				Score
		1201.6	1201.71		0.1096	91	230	239	EFTAGFVQFR											Mascot
		1201.6	1201.71		0.1096	91	230	239	EFTAGFVQFR			59	99.862							Mascot
		1292.59	1292.71		0.1175	91	219	229	TASYYSPYGQR											Mascot
		1292.59	1292.71		0.1175	91	219	229	TASYYSPYGQR			19	0							Mascot
	5	intelectin [Homo sapiens]										gi|37724005		34880.2	5.51	2	86		99.934	78	99.998
		Peptide Information
		Calc. Mass		Obsrv. Mass	± da	± ppm	Start	End	Sequence			Ion	C. I. %	Modification					Rank	Result Type
							Seq.	Seq.				Score
		1201.6	1201.71		0.1096	91	230	239	EFTAGFVQFR											Mascot
		1201.6	1201.71		0.1096	91	230	239	EFTAGFVQFR			59	99.862							Mascot
		1292.59	1292.71		0.1175	91	219	229	TASYYSPYGQR											Mascot
		1292.59	1292.71		0.1175	91	219	229	TASYYSPYGQR			19	0							Mascot
	6	unnamed protein product [Homo sapiens]										gi|189054178		65980	7.62	9	78		99.622	36	69.879
		Peptide Information
		Calc. Mass		Obsrv. Mass	± da	± ppm	Start	End	Sequence			Ion	C. I. %	Modification					Rank	Result Type
							Seq.	Seq.				Score
		1065.52	1065.61		0.0875	82	356	364	AQYEDIAQK											Mascot
		1179.6	1179.71		0.1096	93	377	386	YEELQITAGR											Mascot
		1277.71	1277.82		0.1132	89	473	483	LALDLEIATYR											Mascot
		1475.79	1475.89		0.1047	71	200	211	FLEQQNQVLQTK											Mascot
		1638.86	1639.01		0.1517	93	186	199	SLNNQFASFIDKVR			23	0							Mascot
		1638.86	1639.01		0.1517	93	186	199	SLNNQFASFIDKVR											Mascot
		1993.98	1994.16		0.1838	92	224	239	THNLEPYFESFINNLR			14	0							Mascot
		1993.98	1994.16		0.1779	89	625	644	SSGGSSSVKFVSTTYSG											Mascot
									VTR
		2150.08	2150.28		0.199	93	224	240	THNLEPYFESFINNLRR											Mascot
		2383.95	2384.17		0.2224	93	519	549	GGGGGGYGSGGSSYGS											Mascot
									GGGSYGSGGGGGGGR
	7	keratin 1 [Homo sapiens]										gi|11935049		66027	8.16	8	73		98.748	38	79.555
		Peptide Information
		Calc. Mass		Obsrv. Mass	± da	± ppm	Start	End	Sequence			Ion	C. I. %	Modification					Rank	Result Type
		Calc. Mass		Obsrv. Mass	± da	± ppm	Seq.	Seq.	Sequence			Score	C. I. %	Modification					Rank	Result Type
		1065.52	1065.61		0.0875	82	356	364	AQYEDIAQK											Mascot
		1179.6	1179.71		0.1096	93	377	386	YEELQITAGR											Mascot
		1277.71	1277.82		0.1132	89	473	483	LALDLEIATYR											Mascot
		1475.79	1475.89		0.1047	71	200	211	FLEQQNQVLQTK											Mascot
		1638.86	1639.01		0.1517	93	186	199	SLNNQFASFIDKVR			23	0							Mascot
		1638.86	1639.01		0.1517	93	186	199	SLNNQFASFIDKVR											Mascot
		1993.98	1994.16		0.1838	92	224	239	THNLEPYFESFINNLR			14	0							Mascot
		1993.98	1994.16		0.1838	92	224	239	THNLEPYFESFINNLR											Mascot
		2150.08	2150.28		0.199	93	224	240	THNLEPYFESFINNLRR											Mascot
		2383.95	2384.17		0.2224	93	519	549	GGGGGGYGSGGSSYGS											Mascot
									GGGSYGSGGGGGGGR
	8	keratin 1 [Homo sapiens]										gi|7331218		65978	8.16	7	66		93.869	38	79.555
		Peptide Information
		Calc. Mass		Obsrv. Mass	± da	± ppm	Start	End	Sequence			Ion	C. I. %	Modification					Rank	Result Type
							Seq.	Seq.				Score
		1179.6	1179.71		0.1096	93	377	386	YEELQITAGR											Mascot
		1277.71	1277.82		0.1132	89	473	483	LALDLEIATYR											Mascot
		1475.79	1475.89		0.1047	71	200	211	FLEQQNQVLQTK											Mascot
		1638.86	1639.01		0.1517	93	186	199	SLNNQFASFIDKVR			23	0							Mascot
		1638.86	1639.01		0.1517	93	186	199	SLNNQFASFIDKVR											Mascot
		1993.98	1994.16		0.1838	92	224	239	THNLEPYFESFINNLR			14	0							Mascot
		1993.98	1994.16		0.1838	92	224	239	THNLEPYFESFINNLR											Mascot
		2150.08	2150.28		0.199	93	224	240	THNLEPYFESFINNLRR											Mascot
		2383.95	2384.17		0.2224	93	519	549	GGGGGGYGSGGSSYGS											Mascot
									GGGSYGSGGGGGGGR
	9	type II keratin subunit protein [Homo sapiens]										gi|386854		52756.5	5.31	6	45		0	23	0
		Peptide Information
		Calc. Mass		Obsrv. Mass	± da	± ppm	Start	End	Sequence			Ion	C. I. %	Modification					Rank	Result Type
							Seq.	Seq.				Score
		1065.52	1065.61		0.0875	82	205	213	AQYEDIAQK											Mascot
		1179.6	1179.71		0.1096	93	226	235	YEELQITAGR											Mascot
		1277.71	1277.82		0.1132	89	322	332	LALDLEIATYR											Mascot
		1475.75	1475.89		0.1411	96	61	72	WELLQQVDTSTR											Mascot
		1493.78	1493.87		0.0968	65	49	60	FMEQQNKVLQTK											Mascot
		1638.86	1639.01		0.1517	93	35	48	SLNNQFASFIDKVR			23	0							Mascot
		1638.86	1639.01		0.1517	93	35	48	SLNNQFASFIDKVR											Mascot
			1639.01																	Mascot
	10	diacylglycerol kinase, theta variant [Homo sapiens]										gi|62088586		95632.6	6.84	10	41		0
		Peptide Information
		Calc. Mass		Obsrv. Mass	± da	± ppm	Start	End	Sequence			Ion	C. I. %	Modification					Rank	Result Type
							Seq.	Seq.				Score
		1179.56	1179.71		0.146	124	706	715	EEEPGKFTSR											Mascot
		1292.66	1292.71		0.0454	35	158	170	KTCGSSDVLAGVR											Mascot
		1292.66	1292.71		0.0454	35	158	170	KTCGSSDVLAGVR											Mascot
		1323.79	1323.79		-0.0058	-4	195	206	LRSLVLPPACVR											Mascot
		1493.7	1493.87		0.1774	119	415	426	TMLMDEQPLLDR					Oxidation (M)[2,4]						Mascot
		1638.89	1639.01		0.1191	73	525	539	LPPDSCPLLVFVNPK											Mascot
		1638.89	1639.01		0.1191	73	525	539	LPPDSCPLLVFVNPK											Mascot
		1994.05	1994.16		0.115	58	332	350	SPGSGEATPEAWVIRALP											Mascot
									R
		1994.05	1994.16		0.115	58	332	350	SPGSGEATPEAWVIRALP											Mascot
									R
		2150.13	2150.28		0.1492	69	607	627	LACPEPSVAILPLGTGND					Carbamidomethyl (C)[3]						Mascot
									LGR
		2384.24	2384.17		-0.061	-26	483	503	GAVVLDVACFAEAERLY					Carbamidomethyl (C)[9], Oxidation (M)[18]						Mascot
									MLLK
		2501.2	2501.48		0.2778	111	393	414	QAESPESFQLVEVAMGC											Mascot
									RHVQR
		3324.7	3325.06		0.3643	110	827	857	ATPVQVDGEPWVQAPG					Oxidation (M)[18,29]						Mascot
									HMIISAAGPKVHMLR
Gel Idx/Pos			53/C2						Instr./Gel Origin		BA2060/110322A					Process Status		Analysis Succeeded
Plate [#] Name			[1] 22987						Instrument Sample Name							Spectra		11
Rank		Protein Name						Species				Accession No.		Protein MW	Protein	Pep.		Protein	Protein	Total Ion	Total Ion
															PI	Count		Score	Score	Score	C. I. %
																			C. I. %
	1	immunoglobulin light chain [Homo sapiens]										gi|149673887		23379.6	6.97	7	287		100	244	100
		Peptide Information
		Calc. Mass		Obsrv. Mass	± da	± ppm	Start	End	Sequence			Ion	C. I. %	Modification					Rank	Result Type
							Seq.	Seq.				Score
		1632.79	1632.7		-0.0827	-51	63	78	FSGSGSGTDFTLTISR											Mascot
		1797.9	1797.8		-0.0915	-51	128	143	SGTASVVCLLNNFYPR					Carbamidomethyl (C)[8]						Mascot
		1797.9	1797.8		-0.0915	-51	128	143	SGTASVVCLLNNFYPR			111	100	Carbamidomethyl (C)[8]						Mascot
		1875.93	1875.82		-0.1088	-58	192	208	VYACEVTHQGLSSPVTK					Carbamidomethyl (C)[4]						Mascot
		1884.01	1883.9		-0.105	-56	1	18	EIVLTQSPGTLSLSPGER											Mascot
		1884.01	1883.9		-0.105	-56	1	18	EIVLTQSPGTLSLSPGER			48	98.543							Mascot
		1946.03	1945.9		-0.124	-64	110	127	TVAAPSVFIFPPSDEQLK											Mascot
		1946.03	1945.9		-0.124	-64	110	127	TVAAPSVFIFPPSDEQLK			85	100							Mascot
		2102.13	2102.02		-0.1098	-52	109	127	RTVAAPSVFIFPPSDEQL											Mascot
									K
		3619.71	3619.55		-0.1567	-43	151	184	VDNALQSGNSQESVTEQ											Mascot
									DSKDSTYSLSSTLTLSK
	2	Chain L, Crystal Structure Of A Glycosylated Fab From										gi|99031801		23330.5	6.2	6	279		100	244	100
		An Igm Cryoglobulin With Properties Of A Natu
		Peptide Information
		Calc. Mass		Obsrv. Mass	± da	± ppm	Start	End	Sequence			Ion	C. I. %	Modification					Rank	Result Type
							Seq.	Seq.				Score
		1797.9	1797.8		-0.0915	-51	128	143	SGTASVVCLLNNFYPR					Carbamidomethyl (C)[8]						Mascot
		1797.9	1797.8		-0.0915	-51	128	143	SGTASVVCLLNNFYPR			111	100	Carbamidomethyl (C)[8]						Mascot
		1875.93	1875.82		-0.1088	-58	192	208	VYACEVTHQGLSSPVTK					Carbamidomethyl (C)[4]						Mascot
		1884.01	1883.9		-0.105	-56	1	18	EIVLTQSPGTLSLSPGER											Mascot
		1884.01	1883.9		-0.105	-56	1	18	EIVLTQSPGTLSLSPGER			48	98.543							Mascot
		1946.03	1945.9		-0.124	-64	110	127	TVAAPSVFIFPPSDEQLK											Mascot
		1946.03	1945.9		-0.124	-64	110	127	TVAAPSVFIFPPSDEQLK			85	100							Mascot
		2102.13	2102.02		-0.1098	-52	109	127	RTVAAPSVFIFPPSDEQL											Mascot
									K
		3619.71	3619.55		-0.1567	-43	151	184	VDNALQSGNSQESVTEQ											Mascot
									DSKDSTYSLSSTLTLSK
	3	Chain L, Crystal Structure Of The Intact Human Igg B12										gi|15825649		23662.8	8.96	5	271		100	244	100
		With Broad And Potent Activity Against Prima
		Peptide Information
		Calc. Mass		Obsrv. Mass	± da	± ppm	Start	End	Sequence			Ion	C. I. %	Modification					Rank	Result Type
							Seq.	Seq.				Score
		1797.9	1797.8		-0.0915	-51	128	143	SGTASVVCLLNNFYPR					Carbamidomethyl (C)[8]						Mascot
		1797.9	1797.8		-0.0915	-51	128	143	SGTASVVCLLNNFYPR			111	100	Carbamidomethyl (C)[8]						Mascot
		1884.01	1883.9		-0.105	-56	1	18	EIVLTQSPGTLSLSPGER											Mascot
		1884.01	1883.9		-0.105	-56	1	18	EIVLTQSPGTLSLSPGER			48	98.543							Mascot
		1946.03	1945.9		-0.124	-64	110	127	TVAAPSVFIFPPSDEQLK											Mascot
		1946.03	1945.9		-0.124	-64	110	127	TVAAPSVFIFPPSDEQLK			85	100							Mascot
		2102.13	2102.02		-0.1098	-52	109	127	RTVAAPSVFIFPPSDEQL											Mascot
									K
		3619.71	3619.55		-0.1567	-43	151	184	VDNALQSGNSQESVTEQ											Mascot
									DSKDSTYSLSSTLTLSK
	4	Chain A, Unusual Twinning In Crystals Of The Cits										gi|190613401		23346.5	5.95	6	258		100	223	100
		Binding Antibody Fab Fragment F3p4
		Peptide Information
		Calc. Mass		Obsrv. Mass	± da	± ppm	Start	End	Sequence			Ion	C. I. %	Modification					Rank	Result Type
							Seq.	Seq.				Score
		1797.9	1797.8		-0.0915	-51	128	143	SGTASVVCLLNNFYPR					Carbamidomethyl (C)[8]						Mascot
		1797.9	1797.8		-0.0915	-51	128	143	SGTASVVCLLNNFYPR			111	100	Carbamidomethyl (C)[8]						Mascot
		1875.93	1875.82		-0.1088	-58	192	208	VYACEVTHQGLSSPVTK					Carbamidomethyl (C)[4]						Mascot
		1884.01	1883.9		-0.105	-56	1	18	DIVLTQSPATLSLSPGER											Mascot
		1884.01	1883.9		-0.105	-56	1	18	DIVLTQSPATLSLSPGER			28	0							Mascot
		1946.03	1945.9		-0.124	-64	110	127	TVAAPSVFIFPPSDEQLK											Mascot
		1946.03	1945.9		-0.124	-64	110	127	TVAAPSVFIFPPSDEQLK			85	100							Mascot
		2102.13	2102.02		-0.1098	-52	109	127	RTVAAPSVFIFPPSDEQL											Mascot
									K
		3619.71	3619.55		-0.1567	-43	151	184	VDNALQSGNSQESVTEQ											Mascot
									DSKDSTYSLSSTLTLSK
	5	immunoglobulin light chain [Homo sapiens]										gi|218783334		23152.4	8.31	7	255		100	212	100
		Peptide Information
		Calc. Mass		Obsrv. Mass	± da	± ppm	Start	End	Sequence			Ion	C. I. %	Modification					Rank	Result Type
							Seq.	Seq.				Score
		993.573	993.512		-0.0609	-61	46	54	LLIYGASTR											Mascot
		1797.9	1797.8		-0.0915	-51	127	142	SGTASVVCLLNNFYPR					Carbamidomethyl (C)[8]						Mascot
		1797.9	1797.8		-0.0915	-51	127	142	SGTASVVCLLNNFYPR			111	100	Carbamidomethyl (C)[8]						Mascot
		1875.93	1875.82		-0.1088	-58	191	207	VYACEVTHQGLSSPVTK					Carbamidomethyl (C)[4]						Mascot
		1884.01	1883.9		-0.105	-56	1	18	EIVLTQSPATLSVSPGER											Mascot
		1884.01	1883.9		-0.105	-56	1	18	EIVLTQSPATLSVSPGER			16	0							Mascot
		1946.03	1945.9		-0.124	-64	109	126	TVAAPSVFIFPPSDEQLK											Mascot
		1946.03	1945.9		-0.124	-64	109	126	TVAAPSVFIFPPSDEQLK			85	100							Mascot
		2102.13	2102.02		-0.1098	-52	108	126	RTVAAPSVFIFPPSDEQL											Mascot
									K
		3619.71	3619.55		-0.1567	-43	150	183	VDNALQSGNSQESVTEQ											Mascot
									DSKDSTYSLSSTLTLSK
	6	Chain L, Bha10 Igg1 Wild-Type Fab - Antibody Directed										gi|255311885		23226.4	7.79	8	248		100	196	100
		At Human Ltbr
		Peptide Information
		Calc. Mass		Obsrv. Mass	± da	± ppm	Start	End	Sequence			Ion	C. I. %	Modification					Rank	Result Type
							Seq.	Seq.				Score
		1279.7	1279.69		-0.0128	-10	43	54	APKSLISSASYR											Mascot
		1797.9	1797.8		-0.0915	-51	127	142	SGTASVVCLLNNFYPR					Carbamidomethyl (C)[8]						Mascot
		1797.9	1797.8		-0.0915	-51	127	142	SGTASVVCLLNNFYPR			111	100	Carbamidomethyl (C)[8]						Mascot
		1875.93	1875.82		-0.1088	-58	191	207	VYACEVTHQGLSSPVTK					Carbamidomethyl (C)[4]						Mascot
		1894.88	1894.77		-0.1082	-57	1	18	DIQMTQSPSSLSASVGD					Oxidation (M)[4]						Mascot
									R
		1946.03	1945.9		-0.124	-64	109	126	TVAAPSVFIFPPSDEQLK											Mascot
		1946.03	1945.9		-0.124	-64	109	126	TVAAPSVFIFPPSDEQLK			85	100							Mascot
		2102.13	2102.02		-0.1098	-52	108	126	RTVAAPSVFIFPPSDEQL											Mascot
									K
		2284.22	2284.04		-0.1806	-79	25	45	ASQNVGINVAWYQQKPG											Mascot
									KAPK
		3619.71	3619.55		-0.1567	-43	150	183	VDNALQSGNSQESVTEQ											Mascot
									DSKDSTYSLSSTLTLSK
	7	Chain L, Bha10 Igg1 Fab Double Mutant Variant -										gi|255311889		23252.4	7.79	7	239		100	196	100
		Antibody Directed At Human Ltbr
		Peptide Information
		Calc. Mass		Obsrv. Mass	± da	± ppm	Start	End	Sequence			Ion	C. I. %	Modification					Rank	Result Type
							Seq.	Seq.				Score
		1797.9	1797.8		-0.0915	-51	127	142	SGTASVVCLLNNFYPR					Carbamidomethyl (C)[8]						Mascot
		1797.9	1797.8		-0.0915	-51	127	142	SGTASVVCLLNNFYPR			111	100	Carbamidomethyl (C)[8]						Mascot
		1875.93	1875.82		-0.1088	-58	191	207	VYACEVTHQGLSSPVTK					Carbamidomethyl (C)[4]						Mascot
		1894.88	1894.77		-0.1082	-57	1	18	DIQMTQSPSSLSASVGD					Oxidation (M)[4]						Mascot
									R
		1946.03	1945.9		-0.124	-64	109	126	TVAAPSVFIFPPSDEQLK											Mascot
		1946.03	1945.9		-0.124	-64	109	126	TVAAPSVFIFPPSDEQLK			85	100							Mascot
		2102.13	2102.02		-0.1098	-52	108	126	RTVAAPSVFIFPPSDEQL											Mascot
									K
		2284.22	2284.04		-0.1806	-79	25	45	ASQNVGINVAWYQQKPG											Mascot
									KAPK
		3619.71	3619.55		-0.1567	-43	150	183	VDNALQSGNSQESVTEQ											Mascot
									DSKDSTYSLSSTLTLSK
	8	Chain L, Crystallographic Trimer Of Her2 Extracellular										gi|301598663		23860.7	7.75	7	239		100	196	100
		Regions In Complex With Tryptophan-Rich Anti
		Peptide Information
		Calc. Mass		Obsrv. Mass	± da	± ppm	Start	End	Sequence			Ion	C. I. %	Modification					Rank	Result Type
							Seq.	Seq.				Score
		1797.9	1797.8		-0.0915	-51	127	142	SGTASVVCLLNNFYPR					Carbamidomethyl (C)[8]						Mascot
		1797.9	1797.8		-0.0915	-51	127	142	SGTASVVCLLNNFYPR			111	100	Carbamidomethyl (C)[8]						Mascot
		1875.93	1875.82		-0.1088	-58	191	207	VYACEVTHQGLSSPVTK					Carbamidomethyl (C)[4]						Mascot
		1894.88	1894.77		-0.1082	-57	1	18	DIQMTQSPSSLSASVGD					Oxidation (M)[4]						Mascot
									R
		1946.03	1945.9		-0.124	-64	109	126	TVAAPSVFIFPPSDEQLK											Mascot
		1946.03	1945.9		-0.124	-64	109	126	TVAAPSVFIFPPSDEQLK			85	100							Mascot
		2102.13	2102.02		-0.1098	-52	108	126	RTVAAPSVFIFPPSDEQL											Mascot
									K
		2247.18	2247.06		-0.1167	-52	46	66	LLIYSASSLYSGVPSRFS											Mascot
									GSR
		3619.71	3619.55		-0.1567	-43	150	183	VDNALQSGNSQESVTEQ											Mascot
									DSKDSTYSLSSTLTLSK
	9	Chain L, Crystal Structure Of A Recombinant Ige Fab										gi|160286045		23079.5	8.61	7	239		100	196	100
		Fragment In Complex With Bovine Beta-Lactoglobu
		Peptide Information
		Calc. Mass		Obsrv. Mass	± da	± ppm	Start	End	Sequence			Ion	C. I. %	Modification					Rank	Result Type
							Seq.	Seq.				Score
		1661.92	1661.82		-0.0982	-59	46	61	LLIYAASSLQSGVPSR											Mascot
		1797.9	1797.8		-0.0915	-51	127	142	SGTASVVCLLNNFYPR					Carbamidomethyl (C)[8]						Mascot
		1797.9	1797.8		-0.0915	-51	127	142	SGTASVVCLLNNFYPR			111	100	Carbamidomethyl (C)[8]						Mascot
		1865.89	1865.89		0.0006	0	1	18	DIVMTQSPSSLSASVGDR					Oxidation (M)[4]						Mascot
		1875.93	1875.82		-0.1088	-58	191	207	VYACEVTHQGLSSPVTK					Carbamidomethyl (C)[4]						Mascot
		1946.03	1945.9		-0.124	-64	109	126	TVAAPSVFIFPPSDEQLK											Mascot
		1946.03	1945.9		-0.124	-64	109	126	TVAAPSVFIFPPSDEQLK			85	100							Mascot
		2102.13	2102.02		-0.1098	-52	108	126	RTVAAPSVFIFPPSDEQL											Mascot
									K
		3619.71	3619.55		-0.1567	-43	150	183	VDNALQSGNSQESVTEQ											Mascot
									DSKDSTYSLSSTLTLSK
	10	Chain L, Igg1 Fab Characterized By HD EXCHANGE										gi|225698079		23505.6	8.24	7	239		100	196	100
		Peptide Information
		Calc. Mass		Obsrv. Mass	± da	± ppm	Start	End	Sequence			Ion	C. I. %	Modification					Rank	Result Type
							Seq.	Seq.				Score
		1797.9	1797.8		-0.0915	-51	127	142	SGTASVVCLLNNFYPR					Carbamidomethyl (C)[8]						Mascot
		1797.9	1797.8		-0.0915	-51	127	142	SGTASVVCLLNNFYPR			111	100	Carbamidomethyl (C)[8]						Mascot
		1875.93	1875.82		-0.1088	-58	191	207	VYACEVTHQGLSSPVTK					Carbamidomethyl (C)[4]						Mascot
		1883.98	1883.9		-0.0779	-41	31	45	YYLNWYQQKPGKAPK											Mascot
		1883.98	1883.9		-0.0779	-41	31	45	YYLNWYQQKPGKAPK											Mascot
		1894.88	1894.77		-0.1082	-57	1	18	DIQMTQSPSSLSASVGD					Oxidation (M)[4]						Mascot
									R
		1946.03	1945.9		-0.124	-64	109	126	TVAAPSVFIFPPSDEQLK											Mascot
		1946.03	1945.9		-0.124	-64	109	126	TVAAPSVFIFPPSDEQLK			85	100							Mascot
		2102.13	2102.02		-0.1098	-52	108	126	RTVAAPSVFIFPPSDEQL											Mascot
									K
		3619.71	3619.55		-0.1567	-43	150	183	VDNALQSGNSQESVTEQ											Mascot
									DSKDSTYSLSSTLTLSK
Gel Idx/Pos			54/C3						Instr./Gel Origin		BA2060/110322A					Process Status		Analysis Succeeded
Plate [#] Name			[1] 22987						Instrument Sample Name							Spectra		11
Rank		Protein Name						Species				Accession No.		Protein MW	Protein	Pep.		Protein	Protein	Total Ion	Total Ion
															PI	Count		Score	Score	Score	C. I. %
																			C. I. %
	1	hypothetical protein [Homo sapiens]										gi|34365168		51066.2	7.85	7	63		87.483	35	65.251
		Peptide Information
		Calc. Mass		Obsrv. Mass	± da	± ppm	Start	End	Sequence			Ion	C. I. %	Modification					Rank	Result Type
							Seq.	Seq.				Score
		824.488	824.442		-0.0458	-56	344	351	GLPAPIEK											Mascot
		1051.55	1051.65		0.0986	94	88	96	FTISRDNAK											Mascot
		1051.55	1051.65		0.0986	94	88	96	FTISRDNAK											Mascot
		1286.67	1286.6		-0.0716	-56	362	372	EPQVYTLPPSR											Mascot
		1286.67	1286.6		-0.0716	-56	362	372	EPQVYTLPPSR			35	65.251							Mascot
		1920.94	1920.82		-0.115	-60	362	377	EPQVYTLPPSREEMTK					Oxidation (M)[14]						Mascot
		1920.94	1920.82		-0.115	-60	362	377	EPQVYTLPPSREEMTK			8	0	Oxidation (M)[14]						Mascot
		1921.89	1921.81		-0.0795	-41	410	426	TTPPMLDSDGSFFLYSK					Oxidation (M)[5]						Mascot
		2720.37	2720.14		-0.2312	-85	143	168	GPSVFPLAPCSRSTSEST					Carbamidomethyl (C)[10,23]						Mascot
									VALGCLVK
		3339.81	3339.58		-0.2341	-70	7	38	WVFLVAILEGVQCEVQLV											Mascot
									ESGGGLVKPGGSLR
	2	unnamed protein product [Homo sapiens]										gi|21752739		52286.1	8.45	7	62		83.499	35	65.251
		Peptide Information
		Calc. Mass		Obsrv. Mass	± da	± ppm	Start	End	Sequence			Ion	C. I. %	Modification					Rank	Result Type
							Seq.	Seq.				Score
		1286.67	1286.6		-0.0716	-56	376	386	EPQVYTLPPSR											Mascot
		1286.67	1286.6		-0.0716	-56	376	386	EPQVYTLPPSR			35	65.251							Mascot
		1334.58	1334.8		0.2207	165	109	119	TEDTGRYYCAR											Mascot
		1448.69	1448.81		0.1232	85	120	131	VVYYYDSGGNRR											Mascot
		1677.8	1677.76		-0.0391	-23	306	319	FNWYVDGVEVHNAK											Mascot
		1920.94	1920.82		-0.115	-60	376	391	EPQVYTLPPSREEMTK					Oxidation (M)[14]						Mascot
		1920.94	1920.82		-0.115	-60	376	391	EPQVYTLPPSREEMTK			8	0	Oxidation (M)[14]						Mascot
		2064.03	2064.03		-0.0037	-2	16	35	GVQCGVHLVESGGDLVQ					Carbamidomethyl (C)[4]						Mascot
									PGR
		2914.42	2914.35		-0.0688	-24	280	305	DTLMISRTPEVTCVVVDV					Oxidation (M)[4]						Mascot
									SHEDPEVK
	3	immunoglobulin heavy chain [Homo sapiens]										gi|309753505		50194	8.69	7	60		78.248	35	65.251
		Peptide Information
		Calc. Mass		Obsrv. Mass	± da	± ppm	Start	End	Sequence			Ion	C. I. %	Modification					Rank	Result Type
							Seq.	Seq.				Score
		1286.67	1286.6		-0.0716	-56	354	364	EPQVYTLPPSR											Mascot
		1286.67	1286.6		-0.0716	-56	354	364	EPQVYTLPPSR			35	65.251							Mascot
		1334.57	1334.8		0.2319	174	88	98	AEDTSVYYCAR					Carbamidomethyl (C)[9]						Mascot
		1677.8	1677.76		-0.0391	-23	284	297	FNWYVDGVEVHNAK											Mascot
		1920.94	1920.82		-0.115	-60	354	369	EPQVYTLPPSREEMTK					Oxidation (M)[14]						Mascot
		1920.94	1920.82		-0.115	-60	354	369	EPQVYTLPPSREEMTK			8	0	Oxidation (M)[14]						Mascot
		2193.98	2194.01		0.0281	13	20	38	LSCAASGFTFSSYAMHW					Carbamidomethyl (C)[3], Oxidation (M)[15]						Mascot
									VR
		2602.23	2601.91		-0.322	-124	20	43	LSCAASGFTFSSYAMHW											Mascot
									VRQAPGK
		2914.42	2914.35		-0.0688	-24	258	283	DTLMISRTPEVTCVVVDV					Oxidation (M)[4]						Mascot
									SHEDPEVK
	4	Ig gamma 2 H chain, BUR [human, Peptide Mutant, 348										gi|243169		38698.4	6.22	6	60		76.692	35	65.251
		aa]
		Peptide Information
		Calc. Mass		Obsrv. Mass	± da	± ppm	Start	End	Sequence			Ion	C. I. %	Modification					Rank	Result Type
							Seq.	Seq.				Score
		824.488	824.442		-0.0458	-56	229	236	GLPAPIEK											Mascot
		864.473	864.505		0.0325	38	32	38	FGISWVR											Mascot
		1286.67	1286.6		-0.0716	-56	247	257	EPQVYTLPPSR											Mascot
		1286.67	1286.6		-0.0716	-56	247	257	EPQVYTLPPSR			35	65.251							Mascot
		1334.57	1334.8		0.2319	174	90	100	SDDTAIYYCAR					Carbamidomethyl (C)[9]						Mascot
		1920.94	1920.82		-0.115	-60	247	262	EPQVYTLPPSREEMTK					Oxidation (M)[14]						Mascot
		1920.94	1920.82		-0.115	-60	247	262	EPQVYTLPPSREEMTK			8	0	Oxidation (M)[14]						Mascot
		1921.89	1921.81		-0.0795	-41	295	311	TTPPMLDSDGSFFLYSK					Oxidation (M)[5]						Mascot
	5	recombinant IgG2 heavy chain [Homo sapiens]										gi|14030849		49487.8	7.94	6	58		67.077	35	65.251
		Peptide Information
		Calc. Mass		Obsrv. Mass	± da	± ppm	Start	End	Sequence			Ion	C. I. %	Modification					Rank	Result Type
							Seq.	Seq.				Score
		824.488	824.442		-0.0458	-56	327	334	GLPAPIEK											Mascot
		842.452	842.464		0.0123	15	60	65	YTQRFK											Mascot
		1286.67	1286.6		-0.0716	-56	345	355	EPQVYTLPPSR											Mascot
		1286.67	1286.6		-0.0716	-56	345	355	EPQVYTLPPSR			35	65.251							Mascot
		1920.94	1920.82		-0.115	-60	345	360	EPQVYTLPPSREEMTK					Oxidation (M)[14]						Mascot
		1920.94	1920.82		-0.115	-60	345	360	EPQVYTLPPSREEMTK			8	0	Oxidation (M)[14]						Mascot
		1921.89	1921.81		-0.0795	-41	393	409	TTPPMLDSDGSFFLYSK					Oxidation (M)[5]						Mascot
		2295.07	2295.04		-0.0359	-16	20	38	MSCKASGYSFTSYWLHW											Mascot
									IK
	6	Ig G2 pFc' PIG Gm										gi|223060		12796.2	5.56	3	58		59.495	35	65.251
		Peptide Information
		Calc. Mass		Obsrv. Mass	± da	± ppm	Start	End	Sequence			Ion	C. I. %	Modification					Rank	Result Type
							Seq.	Seq.				Score
		1286.67	1286.6		-0.0716	-56	12	22	EPQVYTLPPSR											Mascot
		1286.67	1286.6		-0.0716	-56	12	22	EPQVYTLPPSR			35	65.251							Mascot
		1920.94	1920.82		-0.115	-60	12	27	EPQVYTLPPSREEMTK					Oxidation (M)[14]						Mascot
		1920.94	1920.82		-0.115	-60	12	27	EPQVYTLPPSREEMTK			8	0	Oxidation (M)[14]						Mascot
		1921.89	1921.81		-0.0795	-41	60	76	TTPPMLDSDGSFFLYSK					Oxidation (M)[5]						Mascot
	7	Chain A, Enzyme Deglycosylated Human Igg1 Fc										gi|254574798		23962	7.16	4	58		58.552	35	65.251
		Fragment
		Peptide Information
		Calc. Mass		Obsrv. Mass	± da	± ppm	Start	End	Sequence			Ion	C. I. %	Modification					Rank	Result Type
							Seq.	Seq.				Score
		1286.67	1286.6		-0.0716	-56	110	120	EPQVYTLPPSR											Mascot
		1286.67	1286.6		-0.0716	-56	110	120	EPQVYTLPPSR			35	65.251							Mascot
		1677.8	1677.76		-0.0391	-23	40	53	FNWYVDGVEVHNAK											Mascot
		1920.94	1920.82		-0.115	-60	110	125	EPQVYTLPPSREEMTK					Oxidation (M)[14]						Mascot
		1920.94	1920.82		-0.115	-60	110	125	EPQVYTLPPSREEMTK			8	0	Oxidation (M)[14]						Mascot
		2914.42	2914.35		-0.0688	-24	14	39	DTLMISRTPEVTCVVVDV					Oxidation (M)[4]						Mascot
									SHEDPEVK
	8	Chain A, Structural Characterization Of A Mutated,										gi|171848866		25406.7	6.37	4	57		57.586	35	65.251
		Adcc-Enhanced Human Fc Fragment
		Peptide Information
		Calc. Mass		Obsrv. Mass	± da	± ppm	Start	End	Sequence			Ion	C. I. %	Modification					Rank	Result Type
							Seq.	Seq.				Score
		1286.67	1286.6		-0.0716	-56	123	133	EPQVYTLPPSR											Mascot
		1286.67	1286.6		-0.0716	-56	123	133	EPQVYTLPPSR			35	65.251							Mascot
		1677.8	1677.76		-0.0391	-23	53	66	FNWYVDGVEVHNAK											Mascot
		1920.94	1920.82		-0.115	-60	123	138	EPQVYTLPPSREEMTK					Oxidation (M)[14]						Mascot
		1920.94	1920.82		-0.115	-60	123	138	EPQVYTLPPSREEMTK			8	0	Oxidation (M)[14]						Mascot
		2914.42	2914.35		-0.0688	-24	27	52	DTLMISRTPEVTCVVVDV					Oxidation (M)[4]						Mascot
									SHEDPEVK
	9	Hepatitis B virus receptor binding protein [Homo										gi|46326410		38138	8.27	5	57		56.598	35	65.251
		sapiens]
		Peptide Information
		Calc. Mass		Obsrv. Mass	± da	± ppm	Start	End	Sequence			Ion	C. I. %	Modification					Rank	Result Type
							Seq.	Seq.				Score
		1286.67	1286.6		-0.0716	-56	246	256	EPQVYTLPPSR											Mascot
		1286.67	1286.6		-0.0716	-56	246	256	EPQVYTLPPSR			35	65.251							Mascot
		1677.8	1677.76		-0.0391	-23	176	189	FNWYVDGVEVHNAK											Mascot
		1920.94	1920.82		-0.115	-60	246	261	EPQVYTLPPSREEMTK					Oxidation (M)[14]						Mascot
		1920.94	1920.82		-0.115	-60	246	261	EPQVYTLPPSREEMTK			8	0	Oxidation (M)[14]						Mascot
		2417.1	2417.13		0.0306	13	1	22	YYYGMDVWGQGTTVTV					Oxidation (M)[5]						Mascot
									SSASTK
		2914.42	2914.35		-0.0688	-24	150	175	DTLMISRTPEVTCVVVDV					Oxidation (M)[4]						Mascot
									SHEDPEVK
	10	unnamed protein product [Homo sapiens]										gi|34527413		52344.1	8.18	6	57		55.588	35	65.251
		Peptide Information
		Calc. Mass		Obsrv. Mass	± da	± ppm	Start	End	Sequence			Ion	C. I. %	Modification					Rank	Result Type
							Seq.	Seq.				Score
		1286.67	1286.6		-0.0716	-56	376	386	EPQVYTLPPSR											Mascot
		1286.67	1286.6		-0.0716	-56	376	386	EPQVYTLPPSR			35	65.251							Mascot
		1334.56	1334.8		0.2431	182	107	117	EDDTAVYYCAK					Carbamidomethyl (C)[9]						Mascot
		1677.8	1677.76		-0.0391	-23	306	319	FNWYVDGVEVHNAK											Mascot
		1920.94	1920.82		-0.115	-60	376	391	EPQVYTLPPSREEMTK					Oxidation (M)[14]						Mascot
		1920.94	1920.82		-0.115	-60	376	391	EPQVYTLPPSREEMTK			8	0	Oxidation (M)[14]						Mascot
		2295.21	2295.04		-0.1685	-73	16	38	GVQSQVQLVESGGNVV											Mascot
									QPGGSLR
		2914.42	2914.35		-0.0688	-24	280	305	DTLMISRTPEVTCVVVDV					Oxidation (M)[4]						Mascot
									SHEDPEVK
Gel Idx/Pos			55/C4						Instr./Gel Origin		BA2060/110322A					Process Status		Analysis Succeeded
Plate [#] Name			[1] 22987						Instrument Sample Name							Spectra		11
Rank		Protein Name						Species				Accession No.		Protein MW	Protein	Pep.		Protein	Protein	Total Ion	Total Ion
															PI	Count		Score	Score	Score	C. I. %
																			C. I. %
	1	PRO2675 [Homo sapiens]										gi|7770217		32553.4	6.14	9	95		99.992	56	99.774
		Peptide Information
		Calc. Mass		Obsrv. Mass	± da	± ppm	Start	End	Sequence			Ion	C. I. %	Modification					Rank	Result Type
							Seq.	Seq.				Score
		960.562	960.502		-0.0605	-63	106	113	FQNALLVR											Mascot
		960.562	960.502		-0.0605	-63	106	113	FQNALLVR			46	97.764							Mascot
		1311.74	1311.66		-0.0788	-60	41	51	HPDYSVVLLLR											Mascot
		1358.63	1358.53		-0.0951	-70	249	260	AVMDDFAAFVEK					Oxidation (M)[3]						Mascot
		1467.84	1467.75		-0.0932	-63	40	51	RHPDYSVVLLLR											Mascot
		1639.78	1639.69		-0.0965	-59	27	39	DVFLGMFLYEYAR			10	0	Oxidation (M)[6]						Mascot
		1639.78	1639.69		-0.0965	-59	27	39	DVFLGMFLYEYAR					Oxidation (M)[6]						Mascot
		1639.78	1639.84		0.0577	35	27	39	DVFLGMFLYEYAR					Oxidation (M)[6]						Mascot
		1910.93	1910.81		-0.1169	-61	188	203	RPCFSALEVDETYVPK					Carbamidomethyl (C)[3]						Mascot
		2045.1	2044.96		-0.1341	-66	76	92	VFDEFKPLVEEPQNLIK											Mascot
		2193.06	2192.98		-0.0742	-34	1	20	MPADLPSLAADFVESKD					Carbamidomethyl (C)[19]						Mascot
									VCK
		2300.11	2300.01		-0.0933	-41	21	39	NYAEAKDVFLGMFLYEY											Mascot
									AR
	2	recombinant IgG2 heavy chain [Homo sapiens]										gi|14030849		49487.8	7.94	7	85		99.921	58	99.867
		Peptide Information
		Calc. Mass		Obsrv. Mass	± da	± ppm	Start	End	Sequence			Ion	C. I. %	Modification					Rank	Result Type
							Seq.	Seq.				Score
		824.488	824.44		-0.048	-58	327	334	GLPAPIEK											Mascot
		842.452	842.458		0.0063	7	60	65	YTQRFK											Mascot
		1286.67	1286.6		-0.0776	-60	345	355	EPQVYTLPPSR			58	99.867							Mascot
		1286.67	1286.6		-0.0776	-60	345	355	EPQVYTLPPSR											Mascot
		1639.82	1639.69		-0.1327	-81	289	301	TKPREEQFNSTFR											Mascot
		1639.82	1639.69		-0.1327	-81	289	301	TKPREEQFNSTFR											Mascot
		1639.82	1639.84		0.0215	13	289	301	TKPREEQFNSTFR											Mascot
		1920.94	1920.8		-0.1351	-70	345	360	EPQVYTLPPSREEMTK			3	0	Oxidation (M)[14]						Mascot
		1920.94	1920.8		-0.1351	-70	345	360	EPQVYTLPPSREEMTK					Oxidation (M)[14]						Mascot
		1921.89	1921.79		-0.1021	-53	393	409	TTPPMLDSDGSFFLYSK					Oxidation (M)[5]						Mascot
		2295.07	2295.02		-0.0527	-23	20	38	MSCKASGYSFTSYWLHW											Mascot
									IK
	3	hCG2003479 [Homo sapiens]										gi|119571258		22314	6.59	5	84		99.901	58	99.867
		Peptide Information
		Calc. Mass		Obsrv. Mass	± da	± ppm	Start	End	Sequence			Ion	C. I. %	Modification					Rank	Result Type
							Seq.	Seq.				Score
		824.488	824.44		-0.048	-58	76	83	GLPAPIEK											Mascot
		1286.67	1286.6		-0.0776	-60	94	104	EPQVYTLPPSR			58	99.867							Mascot
		1286.67	1286.6		-0.0776	-60	94	104	EPQVYTLPPSR											Mascot
		1639.82	1639.69		-0.1327	-81	38	50	TKPREEQFNSTFR											Mascot
		1639.82	1639.69		-0.1327	-81	38	50	TKPREEQFNSTFR											Mascot
		1639.82	1639.84		0.0215	13	38	50	TKPREEQFNSTFR											Mascot
		1920.94	1920.8		-0.1351	-70	94	109	EPQVYTLPPSREEMTK			3	0	Oxidation (M)[14]						Mascot
		1920.94	1920.8		-0.1351	-70	94	109	EPQVYTLPPSREEMTK					Oxidation (M)[14]						Mascot
		1921.89	1921.79		-0.1021	-53	142	158	TTPPMLDSDGSFFLYSK					Oxidation (M)[5]						Mascot
	4	hypothetical protein [Homo sapiens]										gi|34365168		51066.2	7.85	7	83		99.878	58	99.867
		Peptide Information
		Calc. Mass		Obsrv. Mass	± da	± ppm	Start	End	Sequence			Ion	C. I. %	Modification					Rank	Result Type
							Seq.	Seq.				Score
		824.488	824.44		-0.048	-58	344	351	GLPAPIEK											Mascot
		1051.55	1051.64		0.0909	86	88	96	FTISRDNAK											Mascot
		1286.67	1286.6		-0.0776	-60	362	372	EPQVYTLPPSR			58	99.867							Mascot
		1286.67	1286.6		-0.0776	-60	362	372	EPQVYTLPPSR											Mascot
		1639.82	1639.69		-0.1327	-81	306	318	TKPREEQFNSTFR											Mascot
		1639.82	1639.69		-0.1327	-81	306	318	TKPREEQFNSTFR											Mascot
		1639.82	1639.84		0.0215	13	306	318	TKPREEQFNSTFR											Mascot
		1920.94	1920.8		-0.1351	-70	362	377	EPQVYTLPPSREEMTK			3	0	Oxidation (M)[14]						Mascot
		1920.94	1920.8		-0.1351	-70	362	377	EPQVYTLPPSREEMTK					Oxidation (M)[14]						Mascot
		1921.89	1921.79		-0.1021	-53	410	426	TTPPMLDSDGSFFLYSK					Oxidation (M)[5]						Mascot
		2720.37	2720.12		-0.2595	-95	143	168	GPSVFPLAPCSRSTSEST					Carbamidomethyl (C)[10,23]						Mascot
									VALGCLVK
	5	albumin, isoform CRA_h [Homo sapiens]										gi|119626071		68568.1	5.92	11	82		99.86	56	99.774
		Peptide Information
		Calc. Mass		Obsrv. Mass	± da	± ppm	Start	End	Sequence			Ion	C. I. %	Modification					Rank	Result Type
							Seq.	Seq.				Score
		960.562	960.502		-0.0605	-63	427	434	FQNALLVR											Mascot
		960.562	960.502		-0.0605	-63	427	434	FQNALLVR			46	97.764							Mascot
		1311.74	1311.66		-0.0788	-60	362	372	HPDYSVVLLLR											Mascot
		1358.63	1358.53		-0.0951	-70	563	574	AVMDDFAAFVEK					Oxidation (M)[3]						Mascot
		1434.53	1434.67		0.1402	98	106	117	ETYGEMADCCAK					Carbamidomethyl (C)[9,10]						Mascot
		1467.84	1467.75		-0.0932	-63	361	372	RHPDYSVVLLLR											Mascot
		1639.78	1639.69		-0.0965	-59	348	360	DVFLGMFLYEYAR			10	0	Oxidation (M)[6]						Mascot
		1639.78	1639.69		-0.0965	-59	348	360	DVFLGMFLYEYAR					Oxidation (M)[6]						Mascot
		1639.78	1639.84		0.0577	35	348	360	DVFLGMFLYEYAR					Oxidation (M)[6]						Mascot
		1910.93	1910.81		-0.1169	-61	502	517	RPCFSALEVDETYVPK					Carbamidomethyl (C)[3]						Mascot
		1920.88	1920.8		-0.0745	-39	469	483	RMPCAEDYLCVLHEK					Carbamidomethyl (C)[4,10]						Mascot
		1920.88	1920.8		-0.0745	-39	469	483	RMPCAEDYLCVLHEK					Carbamidomethyl (C)[4,10]						Mascot
		2045.1	2044.96		-0.1341	-66	397	413	VFDEFKPLVEEPQNLIK											Mascot
		2193.96	2193.99		0.0256	12	98	117	LCTVATLRETYGEMADC					Oxidation (M)[14]						Mascot
									CAK
		2300.11	2300.01		-0.0933	-41	342	360	NYAEAKDVFLGMFLYEY											Mascot
									AR
	6	Chain A, Crystal Structure Of Human Serum Albumin										gi|228311905		66129.8	5.73	10	82		99.856	56	99.774
		Complexed With Myristic Acid And Lysophosphatidyl
		Peptide Information
		Calc. Mass		Obsrv. Mass	± da	± ppm	Start	End	Sequence			Ion	C. I. %	Modification					Rank	Result Type
							Seq.	Seq.				Score
		960.562	960.502		-0.0605	-63	401	408	FQNALLVR											Mascot
		960.562	960.502		-0.0605	-63	401	408	FQNALLVR			46	97.764							Mascot
		1311.74	1311.66		-0.0788	-60	336	346	HPDYSVVLLLR											Mascot
		1358.63	1358.53		-0.0951	-70	544	555	AVMDDFAAFVEK					Oxidation (M)[3]						Mascot
		1434.53	1434.67		0.1402	98	80	91	ETYGEMADCCAK					Carbamidomethyl (C)[9,10]						Mascot
		1467.84	1467.75		-0.0932	-63	335	346	RHPDYSVVLLLR											Mascot
		1639.78	1639.69		-0.0965	-59	322	334	DVFLGMFLYEYAR			10	0	Oxidation (M)[6]						Mascot
		1639.78	1639.69		-0.0965	-59	322	334	DVFLGMFLYEYAR					Oxidation (M)[6]						Mascot
		1639.78	1639.84		0.0577	35	322	334	DVFLGMFLYEYAR					Oxidation (M)[6]						Mascot
		1910.93	1910.81		-0.1169	-61	483	498	RPCFSALEVDETYVPK					Carbamidomethyl (C)[3]						Mascot
		2045.1	2044.96		-0.1341	-66	371	387	VFDEFKPLVEEPQNLIK											Mascot
		2193.96	2193.99		0.0256	12	72	91	LCTVATLRETYGEMADC					Oxidation (M)[14]						Mascot
									CAK
		2300.11	2300.01		-0.0933	-41	316	334	NYAEAKDVFLGMFLYEY											Mascot
									AR
	7	unnamed protein product [Homo sapiens]										gi|194391080		70317	5.77	11	82		99.846	56	99.774
		Peptide Information
		Calc. Mass		Obsrv. Mass	± da	± ppm	Start	End	Sequence			Ion	C. I. %	Modification					Rank	Result Type
							Seq.	Seq.				Score
		960.562	960.502		-0.0605	-63	436	443	FQNALLVR											Mascot
		960.562	960.502		-0.0605	-63	436	443	FQNALLVR			46	97.764							Mascot
		1311.74	1311.66		-0.0788	-60	371	381	HPDYSVVLLLR											Mascot
		1358.63	1358.53		-0.0951	-70	579	590	AVMDDFAAFVEK					Oxidation (M)[3]						Mascot
		1434.53	1434.67		0.1402	98	115	126	ETYGEMADCCAK					Carbamidomethyl (C)[9,10]						Mascot
		1467.84	1467.75		-0.0932	-63	370	381	RHPDYSVVLLLR											Mascot
		1639.78	1639.69		-0.0965	-59	357	369	DVFLGMFLYEYAR			10	0	Oxidation (M)[6]						Mascot
		1639.78	1639.69		-0.0965	-59	357	369	DVFLGMFLYEYAR					Oxidation (M)[6]						Mascot
		1639.78	1639.84		0.0577	35	357	369	DVFLGMFLYEYAR					Oxidation (M)[6]						Mascot
		1910.93	1910.81		-0.1169	-61	518	533	RPCFSALEVDETYVPK					Carbamidomethyl (C)[3]						Mascot
		2045.1	2044.96		-0.1341	-66	406	422	VFDEFKPLVEEPQNLIK											Mascot
		2193.96	2193.99		0.0256	12	107	126	LCTVATLRETYGEMADC					Oxidation (M)[14]						Mascot
									CAK
		2239.1	2238.99		-0.1149	-51	25	43	DALFIFFFPCPDKSEVAH											Mascot
									R
		2300.11	2300.01		-0.0933	-41	351	369	NYAEAKDVFLGMFLYEY											Mascot
									AR
	8	Chain A, Human Serum Albumin In A Complex With										gi|157830361		65992.7	5.69	10	82		99.846	56	99.774
		Myristic Acid And Tri- Iodobenzoic Acid
		Peptide Information
		Calc. Mass		Obsrv. Mass	± da	± ppm	Start	End	Sequence			Ion	C. I. %	Modification					Rank	Result Type
							Seq.	Seq.				Score
		960.562	960.502		-0.0605	-63	400	407	FQNALLVR											Mascot
		960.562	960.502		-0.0605	-63	400	407	FQNALLVR			46	97.764							Mascot
		1311.74	1311.66		-0.0788	-60	335	345	HPDYSVVLLLR											Mascot
		1358.63	1358.53		-0.0951	-70	543	554	AVMDDFAAFVEK					Oxidation (M)[3]						Mascot
		1434.53	1434.67		0.1402	98	79	90	ETYGEMADCCAK					Carbamidomethyl (C)[9,10]						Mascot
		1467.84	1467.75		-0.0932	-63	334	345	RHPDYSVVLLLR											Mascot
		1639.78	1639.69		-0.0965	-59	321	333	DVFLGMFLYEYAR			10	0	Oxidation (M)[6]						Mascot
		1639.78	1639.69		-0.0965	-59	321	333	DVFLGMFLYEYAR					Oxidation (M)[6]						Mascot
		1639.78	1639.84		0.0577	35	321	333	DVFLGMFLYEYAR					Oxidation (M)[6]						Mascot
		1910.93	1910.81		-0.1169	-61	482	497	RPCFSALEVDETYVPK					Carbamidomethyl (C)[3]						Mascot
		2045.1	2044.96		-0.1341	-66	370	386	VFDEFKPLVEEPQNLIK											Mascot
		2193.96	2193.99		0.0256	12	71	90	LCTVATLRETYGEMADC					Oxidation (M)[14]						Mascot
									CAK
		2300.11	2300.01		-0.0933	-41	315	333	NYAEAKDVFLGMFLYEY											Mascot
									AR
	9	Chain A, Structure Of Human Serum Albumin With										gi|168988718		65777.6	5.63	10	82		99.842	56	99.774
		S-Naproxen And The Ga Module
		Peptide Information
		Calc. Mass		Obsrv. Mass	± da	± ppm	Start	End	Sequence			Ion	C. I. %	Modification					Rank	Result Type
							Seq.	Seq.				Score
		960.562	960.502		-0.0605	-63	398	405	FQNALLVR											Mascot
		960.562	960.502		-0.0605	-63	398	405	FQNALLVR			46	97.764							Mascot
		1311.74	1311.66		-0.0788	-60	333	343	HPDYSVVLLLR											Mascot
		1358.63	1358.53		-0.0951	-70	541	552	AVMDDFAAFVEK					Oxidation (M)[3]						Mascot
		1434.53	1434.67		0.1402	98	77	88	ETYGEMADCCAK					Carbamidomethyl (C)[9,10]						Mascot
		1467.84	1467.75		-0.0932	-63	332	343	RHPDYSVVLLLR											Mascot
		1639.78	1639.69		-0.0965	-59	319	331	DVFLGMFLYEYAR			10	0	Oxidation (M)[6]						Mascot
		1639.78	1639.69		-0.0965	-59	319	331	DVFLGMFLYEYAR					Oxidation (M)[6]						Mascot
		1639.78	1639.84		0.0577	35	319	331	DVFLGMFLYEYAR					Oxidation (M)[6]						Mascot
		1910.93	1910.81		-0.1169	-61	480	495	RPCFSALEVDETYVPK					Carbamidomethyl (C)[3]						Mascot
		2045.1	2044.96		-0.1341	-66	368	384	VFDEFKPLVEEPQNLIK											Mascot
		2193.96	2193.99		0.0256	12	69	88	LCTVATLRETYGEMADC					Oxidation (M)[14]						Mascot
									CAK
		2300.11	2300.01		-0.0933	-41	313	331	NYAEAKDVFLGMFLYEY											Mascot
									AR
	10	Ig gamma 2 H chain, BUR [human, Peptide Mutant, 348										gi|243169		38698.4	6.22	6	81		99.806	58	99.867
		aa]
		Peptide Information
		Calc. Mass		Obsrv. Mass	± da	± ppm	Start	End	Sequence			Ion	C. I. %	Modification					Rank	Result Type
							Seq.	Seq.				Score
		824.488	824.44		-0.048	-58	229	236	GLPAPIEK											Mascot
		864.473	864.503		0.03	35	32	38	FGISWVR											Mascot
		1286.67	1286.6		-0.0776	-60	247	257	EPQVYTLPPSR			58	99.867							Mascot
		1286.67	1286.6		-0.0776	-60	247	257	EPQVYTLPPSR											Mascot
		1639.82	1639.69		-0.1327	-81	191	203	TKPREEQFNSTFR											Mascot
		1639.82	1639.69		-0.1327	-81	191	203	TKPREEQFNSTFR											Mascot
		1639.82	1639.84		0.0215	13	191	203	TKPREEQFNSTFR											Mascot
		1920.94	1920.8		-0.1351	-70	247	262	EPQVYTLPPSREEMTK			3	0	Oxidation (M)[14]						Mascot
		1920.94	1920.8		-0.1351	-70	247	262	EPQVYTLPPSREEMTK					Oxidation (M)[14]						Mascot
		1921.89	1921.79		-0.1021	-53	295	311	TTPPMLDSDGSFFLYSK					Oxidation (M)[5]						Mascot
Gel Idx/Pos			56/C5						Instr./Gel Origin		BA2060/110322A					Process Status		Analysis Succeeded
Plate [#] Name			[1] 22987						Instrument Sample Name							Spectra		11
Rank		Protein Name						Species				Accession No.		Protein MW	Protein	Pep.		Protein	Protein	Total Ion	Total Ion
															PI	Count		Score	Score	Score	C. I. %
																			C. I. %
	1	Ig gamma 2 H chain, BUR [human, Peptide Mutant, 348										gi|243169		38698.4	6.22	6	69		96.997	46	97.368
		aa]
		Peptide Information
		Calc. Mass		Obsrv. Mass	± da	± ppm	Start	End	Sequence			Ion	C. I. %	Modification					Rank	Result Type
							Seq.	Seq.				Score
		824.488	824.438		-0.0492	-60	229	236	GLPAPIEK											Mascot
		864.473	864.495		0.0223	26	32	38	FGISWVR											Mascot
		1286.67	1286.59		-0.0794	-62	247	257	EPQVYTLPPSR			46	97.368							Mascot
		1286.67	1286.59		-0.0794	-62	247	257	EPQVYTLPPSR											Mascot
		1334.57	1334.79		0.22	165	90	100	SDDTAIYYCAR					Carbamidomethyl (C)[9]						Mascot
		1920.94	1920.8		-0.1324	-69	247	262	EPQVYTLPPSREEMTK					Oxidation (M)[14]						Mascot
		1920.94	1920.8		-0.1324	-69	247	262	EPQVYTLPPSREEMTK			6	0	Oxidation (M)[14]						Mascot
		2831.28	2831.01		-0.263	-93	319	341	WQQGNIFSCSVMHEALH					Carbamidomethyl (C)[9], Oxidation (M)[12]						Mascot
									NHYTQK
	2	unnamed protein product [Homo sapiens]										gi|21752739		52286.1	8.45	6	66		94.145	46	97.368
		Peptide Information
		Calc. Mass		Obsrv. Mass	± da	± ppm	Start	End	Sequence			Ion	C. I. %	Modification					Rank	Result Type
							Seq.	Seq.				Score
		1286.67	1286.59		-0.0794	-62	376	386	EPQVYTLPPSR			46	97.368							Mascot
		1286.67	1286.59		-0.0794	-62	376	386	EPQVYTLPPSR											Mascot
		1334.58	1334.79		0.2088	156	109	119	TEDTGRYYCAR											Mascot
		1448.69	1448.82		0.1276	88	120	131	VVYYYDSGGNRR											Mascot
		1677.8	1677.74		-0.0626	-37	306	319	FNWYVDGVEVHNAK											Mascot
		1920.94	1920.8		-0.1324	-69	376	391	EPQVYTLPPSREEMTK					Oxidation (M)[14]						Mascot
		1920.94	1920.8		-0.1324	-69	376	391	EPQVYTLPPSREEMTK			6	0	Oxidation (M)[14]						Mascot
		2384.16	2383.8		-0.3562	-149	131	152	REDAFDVWGQGTMVLVS											Mascot
									SASTK
	3	Unknown (protein for MGC:105008) [Homo sapiens]										gi|59807832		56776.8	6.43	6	65		92.282	46	97.368
		Peptide Information
		Calc. Mass		Obsrv. Mass	± da	± ppm	Start	End	Sequence			Ion	C. I. %	Modification					Rank	Result Type
							Seq.	Seq.				Score
		868.344	868.491	868.491	0.1469	169	1	6	MDCTWR					Carbamidomethyl (C)[3]						Mascot	Mascot
		1286.67	1286.59		-0.0794	-62	417	427	EPQVYTLPPSR			46	97.368							Mascot
		1286.67	1286.59		-0.0794	-62	417	427	EPQVYTLPPSR											Mascot
		1920.94	1920.8		-0.1324	-69	417	432	EPQVYTLPPSREEMTK					Oxidation (M)[14]						Mascot
		1920.94	1920.8		-0.1324	-69	417	432	EPQVYTLPPSREEMTK			6	0	Oxidation (M)[14]						Mascot
		2296	2296.02		0.0203	9	87	106	VTMTEDTSTDTAYMDLS					Oxidation (M)[3,14]						Mascot
									NLR
		2314.06	2314.03		-0.0347	-15	489	507	WQQGNIFSCSVMHEALH					Carbamidomethyl (C)[9]						Mascot
									NR
		3353.77	3353.54		-0.2276	-68	1	31	MDCTWRILLLVAVATGTH					Oxidation (M)[1]						Mascot
									AQVQLVQSGAEVK
		3353.77	3353.54		-0.2276	-68	1	31	MDCTWRILLLVAVATGTH					Oxidation (M)[1]						Mascot
									AQVQLVQSGAEVK
	4	immunoglobulin heavy chain [Homo sapiens]										gi|309753505		50194	8.69	6	64		90.057	46	97.368
		Peptide Information
		Calc. Mass		Obsrv. Mass	± da	± ppm	Start	End	Sequence			Ion	C. I. %	Modification					Rank	Result Type
							Seq.	Seq.				Score
		1286.67	1286.59		-0.0794	-62	354	364	EPQVYTLPPSR			46	97.368							Mascot
		1286.67	1286.59		-0.0794	-62	354	364	EPQVYTLPPSR											Mascot
		1334.57	1334.79		0.22	165	88	98	AEDTSVYYCAR					Carbamidomethyl (C)[9]						Mascot
		1677.8	1677.74		-0.0626	-37	284	297	FNWYVDGVEVHNAK											Mascot
		1920.94	1920.8		-0.1324	-69	354	369	EPQVYTLPPSREEMTK					Oxidation (M)[14]						Mascot
		1920.94	1920.8		-0.1324	-69	354	369	EPQVYTLPPSREEMTK			6	0	Oxidation (M)[14]						Mascot
		2193.98	2194		0.0129	6	20	38	LSCAASGFTFSSYAMHW					Carbamidomethyl (C)[3], Oxidation (M)[15]						Mascot
									VR
		2602.23	2601.89		-0.3467	-133	20	43	LSCAASGFTFSSYAMHW											Mascot
									VRQAPGK
	5	hypothetical protein [Homo sapiens]										gi|34365168		51066.2	7.85	5	63		88.844	46	97.368
		Peptide Information
		Calc. Mass		Obsrv. Mass	± da	± ppm	Start	End	Sequence			Ion	C. I. %	Modification					Rank	Result Type
							Seq.	Seq.				Score
		824.488	824.438		-0.0492	-60	344	351	GLPAPIEK											Mascot
		1051.55	1051.64		0.0907	86	88	96	FTISRDNAK											Mascot
		1051.55	1051.64		0.0907	86	88	96	FTISRDNAK											Mascot
		1286.67	1286.59		-0.0794	-62	362	372	EPQVYTLPPSR			46	97.368							Mascot
		1286.67	1286.59		-0.0794	-62	362	372	EPQVYTLPPSR											Mascot
		1920.94	1920.8		-0.1324	-69	362	377	EPQVYTLPPSREEMTK					Oxidation (M)[14]						Mascot
		1920.94	1920.8		-0.1324	-69	362	377	EPQVYTLPPSREEMTK			6	0	Oxidation (M)[14]						Mascot
		2720.37	2720.11		-0.2622	-96	143	168	GPSVFPLAPCSRSTSEST					Carbamidomethyl (C)[10,23]						Mascot
									VALGCLVK
	6	anti-rabies SOJB immunoglobulin heavy chain [Homo										gi|27728679		56967.3	8.13	5	61		83.115	46	97.368
		sapiens]
		Peptide Information
		Calc. Mass		Obsrv. Mass	± da	± ppm	Start	End	Sequence			Ion	C. I. %	Modification					Rank	Result Type
							Seq.	Seq.				Score
		1286.67	1286.59		-0.0794	-62	416	426	EPQVYTLPPSR			46	97.368							Mascot
		1286.67	1286.59		-0.0794	-62	416	426	EPQVYTLPPSR											Mascot
		1920.94	1920.8		-0.1324	-69	416	431	EPQVYTLPPSREEMTK					Oxidation (M)[14]						Mascot
		1920.94	1920.8		-0.1324	-69	416	431	EPQVYTLPPSREEMTK			6	0	Oxidation (M)[14]						Mascot
		1922.96	1922.78		-0.1835	-95	65	79	ALEWVTLIYWDDDKR											Mascot
		2314.06	2314.03		-0.0347	-15	488	506	WQQGNIFSCSVMHEALH					Carbamidomethyl (C)[9]						Mascot
									NR
		2705.49	2704.99		-0.4968	-184	1	24	MDTLCSTLLLLTIPSWVLS					Oxidation (M)[1]						Mascot
									QITLK
	7	Chain A, Crystal Structure Of A Human Type Iii Fc										gi|55669886		25219.6	7.18	3	61		83.115	46	97.368
		Gamma Receptor In Complex With An Fc Fragment Of
		Peptide Information
		Calc. Mass		Obsrv. Mass	± da	± ppm	Start	End	Sequence			Ion	C. I. %	Modification					Rank	Result Type
							Seq.	Seq.				Score
		1286.67	1286.59		-0.0794	-62	122	132	EPQVYTLPPSR			46	97.368							Mascot
		1286.67	1286.59		-0.0794	-62	122	132	EPQVYTLPPSR											Mascot
		1677.8	1677.74		-0.0626	-37	52	65	FNWYVDGVEVHNAK											Mascot
		1920.94	1920.8		-0.1324	-69	122	137	EPQVYTLPPSREEMTK					Oxidation (M)[14]						Mascot
		1920.94	1920.8		-0.1324	-69	122	137	EPQVYTLPPSREEMTK			6	0	Oxidation (M)[14]						Mascot
	8	Chain A, Structural Characterization Of A Mutated,										gi|171848866		25406.7	6.37	3	61		82.722	46	97.368
		Adcc-Enhanced Human Fc Fragment
		Peptide Information
		Calc. Mass		Obsrv. Mass	± da	± ppm	Start	End	Sequence			Ion	C. I. %	Modification					Rank	Result Type
							Seq.	Seq.				Score
		1286.67	1286.59		-0.0794	-62	123	133	EPQVYTLPPSR			46	97.368							Mascot
		1286.67	1286.59		-0.0794	-62	123	133	EPQVYTLPPSR											Mascot
		1677.8	1677.74		-0.0626	-37	53	66	FNWYVDGVEVHNAK											Mascot
		1920.94	1920.8		-0.1324	-69	123	138	EPQVYTLPPSREEMTK					Oxidation (M)[14]						Mascot
		1920.94	1920.8		-0.1324	-69	123	138	EPQVYTLPPSREEMTK			6	0	Oxidation (M)[14]						Mascot
	9	recombinant IgG2 heavy chain [Homo sapiens]										gi|14030849		49487.8	7.94	4	61		81.486	46	97.368
		Peptide Information
		Calc. Mass		Obsrv. Mass	± da	± ppm	Start	End	Sequence			Ion	C. I. %	Modification					Rank	Result Type
		Calc. Mass		Obsrv. Mass	± da	± ppm	Seq.	Seq.	Sequence			Score	C. I. %	Modification					Rank	Result Type
		824.488	824.438		-0.0492	-60	327	334	GLPAPIEK											Mascot
		842.452	842.456		0.0041	5	60	65	YTQRFK											Mascot
		1286.67	1286.59		-0.0794	-62	345	355	EPQVYTLPPSR			46	97.368							Mascot
		1286.67	1286.59		-0.0794	-62	345	355	EPQVYTLPPSR											Mascot
		1920.94	1920.8		-0.1324	-69	345	360	EPQVYTLPPSREEMTK					Oxidation (M)[14]						Mascot
		1920.94	1920.8		-0.1324	-69	345	360	EPQVYTLPPSREEMTK			6	0	Oxidation (M)[14]						Mascot
	10	Ig G2 pFc' PIG Gm										gi|223060		12796.2	5.56	2	61		81.486	46	97.368
		Peptide Information
		Calc. Mass		Obsrv. Mass	± da	± ppm	Start	End	Sequence			Ion	C. I. %	Modification					Rank	Result Type
							Seq.	Seq.				Score
		1286.67	1286.59		-0.0794	-62	12	22	EPQVYTLPPSR			46	97.368							Mascot
		1286.67	1286.59		-0.0794	-62	12	22	EPQVYTLPPSR											Mascot
		1920.94	1920.8		-0.1324	-69	12	27	EPQVYTLPPSREEMTK					Oxidation (M)[14]						Mascot
		1920.94	1920.8		-0.1324	-69	12	27	EPQVYTLPPSREEMTK			6	0	Oxidation (M)[14]						Mascot
Gel Idx/Pos			57/C6						Instr./Gel Origin		BA2060/110322A					Process Status		Analysis Succeeded
Plate [#] Name			[1] 22987						Instrument Sample Name							Spectra		11
Rank		Protein Name						Species				Accession No.		Protein MW	Protein	Pep.		Protein	Protein	Total Ion	Total Ion
															PI	Count		Score	Score	Score	C. I. %
																			C. I. %
	1	Chain L, Bha10 Igg1 Wild-Type Fab - Antibody Directed										gi|255311885		23226.4	7.79	8	238		100	186	100
		At Human Ltbr
		Peptide Information
		Calc. Mass		Obsrv. Mass	± da	± ppm	Start	End	Sequence			Ion	C. I. %	Modification					Rank	Result Type
							Seq.	Seq.				Score
		1279.7	1279.67		-0.0299	-23	43	54	APKSLISSASYR											Mascot
		1797.9	1797.76		-0.1312	-73	127	142	SGTASVVCLLNNFYPR			99	100	Carbamidomethyl (C)[8]						Mascot
		1797.9	1797.76		-0.1312	-73	127	142	SGTASVVCLLNNFYPR					Carbamidomethyl (C)[8]						Mascot
		1875.93	1875.78		-0.1446	-77	191	207	VYACEVTHQGLSSPVTK					Carbamidomethyl (C)[4]						Mascot
		1894.88	1894.73		-0.1476	-78	1	18	DIQMTQSPSSLSASVGD					Oxidation (M)[4]						Mascot
									R
		1946.03	1945.86		-0.1646	-85	109	126	TVAAPSVFIFPPSDEQLK			87	100							Mascot
		1946.03	1945.86		-0.1646	-85	109	126	TVAAPSVFIFPPSDEQLK											Mascot
		2102.13	2101.97		-0.1579	-75	108	126	RTVAAPSVFIFPPSDEQL											Mascot
									K
		2284.22	2283.99		-0.226	-99	25	45	ASQNVGINVAWYQQKPG											Mascot
									KAPK
		3619.71	3619.47		-0.2385	-66	150	183	VDNALQSGNSQESVTEQ											Mascot
									DSKDSTYSLSSTLTLSK
	2	immunoglobulin kappa 1 light chain [Homo sapiens]										gi|170684422		23243.4	6.17	7	229		100	186	100
		Peptide Information
		Calc. Mass		Obsrv. Mass	± da	± ppm	Start	End	Sequence			Ion	C. I. %	Modification					Rank	Result Type
							Seq.	Seq.				Score
		1797.9	1797.76		-0.1312	-73	127	142	SGTASVVCLLNNFYPR			99	100	Carbamidomethyl (C)[8]						Mascot
		1797.9	1797.76		-0.1312	-73	127	142	SGTASVVCLLNNFYPR					Carbamidomethyl (C)[8]						Mascot
		1875.93	1875.78		-0.1446	-77	191	207	VYACEVTHQGLSSPVTK					Carbamidomethyl (C)[4]						Mascot
		1894.88	1894.73		-0.1476	-78	1	18	DIQMTQSPSSVSASIGDR					Oxidation (M)[4]						Mascot
		1946.03	1945.86		-0.1646	-85	109	126	TVAAPSVFIFPPSDEQLK			87	100							Mascot
		1946.03	1945.86		-0.1646	-85	109	126	TVAAPSVFIFPPSDEQLK											Mascot
		2102.13	2101.97		-0.1579	-75	108	126	RTVAAPSVFIFPPSDEQL											Mascot
									K
		2720.41	2720.08		-0.3296	-121	19	42	VTITCRASQGIGTWLAWY											Mascot
									QQRPGK
		3619.71	3619.47		-0.2385	-66	150	183	VDNALQSGNSQESVTEQ											Mascot
									DSKDSTYSLSSTLTLSK
	3	Chain L, Bha10 Igg1 Fab Double Mutant Variant -										gi|255311889		23252.4	7.79	7	229		100	186	100
		Antibody Directed At Human Ltbr
		Peptide Information
		Calc. Mass		Obsrv. Mass	± da	± ppm	Start	End	Sequence			Ion	C. I. %	Modification					Rank	Result Type
							Seq.	Seq.				Score
		1797.9	1797.76		-0.1312	-73	127	142	SGTASVVCLLNNFYPR			99	100	Carbamidomethyl (C)[8]						Mascot
		1797.9	1797.76		-0.1312	-73	127	142	SGTASVVCLLNNFYPR					Carbamidomethyl (C)[8]						Mascot
		1875.93	1875.78		-0.1446	-77	191	207	VYACEVTHQGLSSPVTK					Carbamidomethyl (C)[4]						Mascot
		1894.88	1894.73		-0.1476	-78	1	18	DIQMTQSPSSLSASVGD					Oxidation (M)[4]						Mascot
									R
		1946.03	1945.86		-0.1646	-85	109	126	TVAAPSVFIFPPSDEQLK			87	100							Mascot
		1946.03	1945.86		-0.1646	-85	109	126	TVAAPSVFIFPPSDEQLK											Mascot
		2102.13	2101.97		-0.1579	-75	108	126	RTVAAPSVFIFPPSDEQL											Mascot
									K
		2284.22	2283.99		-0.226	-99	25	45	ASQNVGINVAWYQQKPG											Mascot
									KAPK
		3619.71	3619.47		-0.2385	-66	150	183	VDNALQSGNSQESVTEQ											Mascot
									DSKDSTYSLSSTLTLSK
	4	Chain L, Mature Oxy-Cope Catalytic Antibody With										gi|2914180		23491.6	6.19	7	229		100	186	100
		Hapten
		Peptide Information
		Calc. Mass		Obsrv. Mass	± da	± ppm	Start	End	Sequence			Ion	C. I. %	Modification					Rank	Result Type
							Seq.	Seq.				Score
		842.473	842.45		-0.0232	-28	54	61	LVDGVPSR											Mascot
		1797.9	1797.76		-0.1312	-73	127	142	SGTASVVCLLNNFYPR			99	100	Carbamidomethyl (C)[8]						Mascot
		1797.9	1797.76		-0.1312	-73	127	142	SGTASVVCLLNNFYPR					Carbamidomethyl (C)[8]						Mascot
		1875.93	1875.78		-0.1446	-77	191	207	VYACEVTHQGLSSPVTK					Carbamidomethyl (C)[4]						Mascot
		1946.03	1945.86		-0.1646	-85	109	126	TVAAPSVFIFPPSDEQLK			87	100							Mascot
		1946.03	1945.86		-0.1646	-85	109	126	TVAAPSVFIFPPSDEQLK											Mascot
		1967.97	1967.84		-0.1314	-67	1	18	ELVLTQSPSSMYASLGE											Mascot
									R
		2102.13	2101.97		-0.1579	-75	108	126	RTVAAPSVFIFPPSDEQL											Mascot
									K
		3619.71	3619.47		-0.2385	-66	150	183	VDNALQSGNSQESVTEQ											Mascot
									DSKDSTYSLSSTLTLSK
	5	immunoglobulin kappa 1 light chain [Homo sapiens]										gi|170684606		23238.3	5.72	7	229		100	186	100
		Peptide Information
		Calc. Mass		Obsrv. Mass	± da	± ppm	Start	End	Sequence			Ion	C. I. %	Modification					Rank	Result Type
							Seq.	Seq.				Score
		1747.92	1747.79		-0.1306	-75	46	61	LLIYDASNLETGVPSR											Mascot
		1797.9	1797.76		-0.1312	-73	127	142	SGTASVVCLLNNFYPR			99	100	Carbamidomethyl (C)[8]						Mascot
		1797.9	1797.76		-0.1312	-73	127	142	SGTASVVCLLNNFYPR					Carbamidomethyl (C)[8]						Mascot
		1875.93	1875.78		-0.1446	-77	191	207	VYACEVTHQGLSSPVTK					Carbamidomethyl (C)[4]						Mascot
		1894.88	1894.73		-0.1476	-78	1	18	DIQMTQSPSSLSASVGD					Oxidation (M)[4]						Mascot
									R
		1946.03	1945.86		-0.1646	-85	109	126	TVAAPSVFIFPPSDEQLK			87	100							Mascot
		1946.03	1945.86		-0.1646	-85	109	126	TVAAPSVFIFPPSDEQLK											Mascot
		2102.13	2101.97		-0.1579	-75	108	126	RTVAAPSVFIFPPSDEQL											Mascot
									K
		3619.71	3619.47		-0.2385	-66	150	183	VDNALQSGNSQESVTEQ											Mascot
									DSKDSTYSLSSTLTLSK
	6	Chain L, Igg1 Fab Characterized By HD EXCHANGE										gi|225698079		23505.6	8.24	7	228		100	186	100
		Peptide Information
		Calc. Mass		Obsrv. Mass	± da	± ppm	Start	End	Sequence			Ion	C. I. %	Modification					Rank	Result Type
							Seq.	Seq.				Score
		1797.9	1797.76		-0.1312	-73	127	142	SGTASVVCLLNNFYPR			99	100	Carbamidomethyl (C)[8]						Mascot
		1797.9	1797.76		-0.1312	-73	127	142	SGTASVVCLLNNFYPR					Carbamidomethyl (C)[8]						Mascot
		1875.93	1875.78		-0.1446	-77	191	207	VYACEVTHQGLSSPVTK					Carbamidomethyl (C)[4]						Mascot
		1883.98	1883.87		-0.1147	-61	31	45	YYLNWYQQKPGKAPK											Mascot
		1894.88	1894.73		-0.1476	-78	1	18	DIQMTQSPSSLSASVGD					Oxidation (M)[4]						Mascot
									R
		1946.03	1945.86		-0.1646	-85	109	126	TVAAPSVFIFPPSDEQLK			87	100							Mascot
		1946.03	1945.86		-0.1646	-85	109	126	TVAAPSVFIFPPSDEQLK											Mascot
		2102.13	2101.97		-0.1579	-75	108	126	RTVAAPSVFIFPPSDEQL											Mascot
									K
		3619.71	3619.47		-0.2385	-66	150	183	VDNALQSGNSQESVTEQ											Mascot
									DSKDSTYSLSSTLTLSK
	7	Chain L, Crystal Structure The Fab Fragment Of										gi|226887753		23397.6	8.24	7	228		100	186	100
		Efalizumab
		Peptide Information
		Calc. Mass		Obsrv. Mass	± da	± ppm	Start	End	Sequence			Ion	C. I. %	Modification					Rank	Result Type
							Seq.	Seq.				Score
		1677.91	1677.76		-0.151	-90	32	45	YLAWYQQKPGKAPK											Mascot
		1797.9	1797.76		-0.1312	-73	127	142	SGTASVVCLLNNFYPR			99	100	Carbamidomethyl (C)[8]						Mascot
		1797.9	1797.76		-0.1312	-73	127	142	SGTASVVCLLNNFYPR					Carbamidomethyl (C)[8]						Mascot
		1875.93	1875.78		-0.1446	-77	191	207	VYACEVTHQGLSSPVTK					Carbamidomethyl (C)[4]						Mascot
		1894.88	1894.73		-0.1476	-78	1	18	DIQMTQSPSSLSASVGD					Oxidation (M)[4]						Mascot
									R
		1946.03	1945.86		-0.1646	-85	109	126	TVAAPSVFIFPPSDEQLK			87	100							Mascot
		1946.03	1945.86		-0.1646	-85	109	126	TVAAPSVFIFPPSDEQLK											Mascot
		2102.13	2101.97		-0.1579	-75	108	126	RTVAAPSVFIFPPSDEQL											Mascot
									K
		3619.71	3619.47		-0.2385	-66	150	183	VDNALQSGNSQESVTEQ											Mascot
									DSKDSTYSLSSTLTLSK
	8	immunoglobulin kappa 1 light chain [Homo sapiens]										gi|170684520		23516.5	5.93	7	228		100	186	100
		Peptide Information
		Calc. Mass		Obsrv. Mass	± da	± ppm	Start	End	Sequence			Ion	C. I. %	Modification					Rank	Result Type
							Seq.	Seq.				Score
		1334.67	1334.78		0.1017	76	19	30	VTITCQASQDIR											Mascot
		1797.9	1797.76		-0.1312	-73	127	142	SGTASVVCLLNNFYPR			99	100	Carbamidomethyl (C)[8]						Mascot
		1797.9	1797.76		-0.1312	-73	127	142	SGTASVVCLLNNFYPR					Carbamidomethyl (C)[8]						Mascot
		1875.93	1875.78		-0.1446	-77	191	207	VYACEVTHQGLSSPVTK					Carbamidomethyl (C)[4]						Mascot
		1894.88	1894.73		-0.1476	-78	1	18	DIQMTQSPSSLSASVGD					Oxidation (M)[4]						Mascot
									R
		1946.03	1945.86		-0.1646	-85	109	126	TVAAPSVFIFPPSDEQLK			87	100							Mascot
		1946.03	1945.86		-0.1646	-85	109	126	TVAAPSVFIFPPSDEQLK											Mascot
		2102.13	2101.97		-0.1579	-75	108	126	RTVAAPSVFIFPPSDEQL											Mascot
									K
		3619.71	3619.47		-0.2385	-66	150	183	VDNALQSGNSQESVTEQ											Mascot
									DSKDSTYSLSSTLTLSK
	9	Chain A, Unusual Twinning In Crystals Of The Cits										gi|190613401		23346.5	5.95	7	228		100	186	100
		Binding Antibody Fab Fragment F3p4
		Peptide Information
		Calc. Mass		Obsrv. Mass	± da	± ppm	Start	End	Sequence			Ion	C. I. %	Modification					Rank	Result Type
							Seq.	Seq.				Score
		1705.92	1705.79		-0.1317	-77	47	62	LLIYDSSSRATGVPAR											Mascot
		1797.9	1797.76		-0.1312	-73	128	143	SGTASVVCLLNNFYPR			99	100	Carbamidomethyl (C)[8]						Mascot
		1797.9	1797.76		-0.1312	-73	128	143	SGTASVVCLLNNFYPR					Carbamidomethyl (C)[8]						Mascot
		1875.93	1875.78		-0.1446	-77	192	208	VYACEVTHQGLSSPVTK					Carbamidomethyl (C)[4]						Mascot
		1884.01	1883.87		-0.1418	-75	1	18	DIVLTQSPATLSLSPGER											Mascot
		1946.03	1945.86		-0.1646	-85	110	127	TVAAPSVFIFPPSDEQLK			87	100							Mascot
		1946.03	1945.86		-0.1646	-85	110	127	TVAAPSVFIFPPSDEQLK											Mascot
		2102.13	2101.97		-0.1579	-75	109	127	RTVAAPSVFIFPPSDEQL											Mascot
									K
		3619.71	3619.47		-0.2385	-66	151	184	VDNALQSGNSQESVTEQ											Mascot
									DSKDSTYSLSSTLTLSK
	10	immunoglobulin kappa light chain VLJ region [Homo										gi|21669351		29487.4	5.75	7	225		100	186	100
		sapiens]
		Peptide Information
		Calc. Mass		Obsrv. Mass	± da	± ppm	Start	End	Sequence			Ion	C. I. %	Modification					Rank	Result Type
							Seq.	Seq.				Score
		1797.9	1797.76		-0.1312	-73	155	170	SGTASVVCLLNNFYPR			99	100	Carbamidomethyl (C)[8]						Mascot
		1797.9	1797.76		-0.1312	-73	155	170	SGTASVVCLLNNFYPR					Carbamidomethyl (C)[8]						Mascot
		1875.93	1875.78		-0.1446	-77	219	235	VYACEVTHQGLSSPVTK					Carbamidomethyl (C)[4]						Mascot
		1946.03	1945.86		-0.1646	-85	137	154	TVAAPSVFIFPPSDEQLK			87	100							Mascot
		1946.03	1945.86		-0.1646	-85	137	154	TVAAPSVFIFPPSDEQLK											Mascot
		2102.13	2101.97		-0.1579	-75	136	154	RTVAAPSVFIFPPSDEQL											Mascot
									K
		2807.26	2807.11		-0.1458	-52	246	272	QSTPFVCEYQGQSSDLP					Carbamidomethyl (C)[7]						Mascot
									QPPVNAGGGS
		3353.48	3353.52		0.0359	11	240	272	GECSARQSTPFVCEYQG											Mascot
									QSSDLPQPPVNAGGGS
		3619.71	3619.47		-0.2385	-66	178	211	VDNALQSGNSQESVTEQ											Mascot
									DSKDSTYSLSSTLTLSK
Gel Idx/Pos			58/C7						Instr./Gel Origin		BA2060/110322A					Process Status		Analysis Succeeded
Plate [#] Name			[1] 22987						Instrument Sample Name							Spectra		11
Rank		Protein Name						Species				Accession No.		Protein MW	Protein	Pep.		Protein	Protein	Total Ion	Total Ion
															PI	Count		Score	Score	Score	C. I. %
																			C. I. %
	1	unnamed protein product [Homo sapiens]										gi|1335098		49264	6.43	6	60		78.248	42	94.697
		Peptide Information
		Calc. Mass		Obsrv. Mass	± da	± ppm	Start	End	Sequence			Ion	C. I. %	Modification					Rank	Result Type
							Seq.	Seq.				Score
		1070.57	1070.5		-0.0697	-65	191	199	GEVPPRYPR											Mascot
		1268.67	1268.58		-0.099	-78	186	196	FDPVRGEVPPR			15	0							Mascot
		1268.67	1268.58		-0.099	-78	186	196	FDPVRGEVPPR											Mascot
		1404.67	1404.56		-0.1058	-75	158	170	SWPAVGNCSSALR					Carbamidomethyl (C)[8]						Mascot
		1495.68	1495.57		-0.1069	-71	175	185	YYCFQGNQFLR			27	0	Carbamidomethyl (C)[3]						Mascot
		1495.68	1495.57		-0.1069	-71	175	185	YYCFQGNQFLR					Carbamidomethyl (C)[3]						Mascot
		2233.18	2232.9		-0.2725	-122	419	439	LNAAKALPQPQNVTSLLG					Carbamidomethyl (C)[19]						Mascot
									CTH
		2498.23	2498.03		-0.209	-84	325	348	EVGTPHGIILDSVDAAFIC					Carbamidomethyl (C)[19]						Mascot
									PGSSR
	2	hemopexin precursor [Homo sapiens]										gi|386789		51512.2	6.57	6	58		59.495	42	94.697
		Peptide Information
		Calc. Mass		Obsrv. Mass	± da	± ppm	Start	End	Sequence			Ion	C. I. %	Modification					Rank	Result Type
							Seq.	Seq.				Score
		1070.57	1070.5		-0.0697	-65	213	221	GEVPPRYPR											Mascot
		1268.67	1268.58		-0.099	-78	208	218	FDPVRGEVPPR			15	0							Mascot
		1268.67	1268.58		-0.099	-78	208	218	FDPVRGEVPPR											Mascot
		1404.67	1404.56		-0.1058	-75	180	192	SWPAVGNCSSALR					Carbamidomethyl (C)[8]						Mascot
		1495.68	1495.57		-0.1069	-71	197	207	YYCFQGNQFLR			27	0	Carbamidomethyl (C)[3]						Mascot
		1495.68	1495.57		-0.1069	-71	197	207	YYCFQGNQFLR					Carbamidomethyl (C)[3]						Mascot
		2233.18	2232.9		-0.2725	-122	441	461	LNAAKALPQPQNVTSLLG					Carbamidomethyl (C)[19]						Mascot
									CTH
		2498.23	2498.03		-0.209	-84	347	370	EVGTPHGIILDSVDAAFIC					Carbamidomethyl (C)[19]						Mascot
									PGSSR
	3	unnamed protein product [Homo sapiens]										gi|189053897		51671.3	6.55	6	57		54.553	42	94.697
		Peptide Information
		Calc. Mass		Obsrv. Mass	± da	± ppm	Start	End	Sequence			Ion	C. I. %	Modification					Rank	Result Type
							Seq.	Seq.				Score
		1070.57	1070.5		-0.0697	-65	214	222	GEVPPRYPR											Mascot
		1268.67	1268.58		-0.099	-78	209	219	FDPVRGEVPPR			15	0							Mascot
		1268.67	1268.58		-0.099	-78	209	219	FDPVRGEVPPR											Mascot
		1404.67	1404.56		-0.1058	-75	181	193	SWPAVGNCSSALR					Carbamidomethyl (C)[8]						Mascot
		1495.68	1495.57		-0.1069	-71	198	208	YYCFQGNQFLR			27	0	Carbamidomethyl (C)[3]						Mascot
		1495.68	1495.57		-0.1069	-71	198	208	YYCFQGNQFLR					Carbamidomethyl (C)[3]						Mascot
		2233.18	2232.9		-0.2725	-122	442	462	LNAAKALPQPQNVTSLLG					Carbamidomethyl (C)[19]						Mascot
									CTH
		2498.23	2498.03		-0.209	-84	348	371	EVGTPHGIILDSVDAAFIC					Carbamidomethyl (C)[19]						Mascot
									PGSSR
	4	Chain A, Crystal Structure Of A Human Fc Fragment										gi|225734126		23720.9	6.66	5	57		50.168	32	46.844
		Engineered For Extended Serum Half-Life
		Peptide Information
		Calc. Mass		Obsrv. Mass	± da	± ppm	Start	End	Sequence			Ion	C. I. %	Modification					Rank	Result Type
							Seq.	Seq.				Score
		838.503	838.451		-0.0521	-62	92	99	ALPAPIEK											Mascot
		1286.67	1286.58		-0.0987	-77	110	120	EPQVYTLPPSR											Mascot
		1677.8	1677.7		-0.1049	-63	40	53	FNWYVDGVEVHNAK											Mascot
		1872.97	1872.82		-0.1529	-82	110	125	EPQVYTLPPSRDELTK											Mascot
		1872.97	1872.82		-0.1529	-82	110	125	EPQVYTLPPSRDELTK			32	46.844							Mascot
		2233.24	2232.9		-0.3347	-150	1	20	GGPSVFLFPPKPKDTLYI											Mascot
									TR
	5	HPX protein [Homo sapiens]										gi|13529281		28612	6.45	4	56		35.804	42	94.697
		Peptide Information
		Calc. Mass		Obsrv. Mass	± da	± ppm	Start	End	Sequence			Ion	C. I. %	Modification					Rank	Result Type
							Seq.	Seq.				Score
		1070.57	1070.5		-0.0697	-65	214	222	GEVPPRYPR											Mascot
		1268.67	1268.58		-0.099	-78	209	219	FDPVRGEVPPR			15	0							Mascot
		1268.67	1268.58		-0.099	-78	209	219	FDPVRGEVPPR											Mascot
		1404.67	1404.56		-0.1058	-75	181	193	SWPAVGNCSSALR					Carbamidomethyl (C)[8]						Mascot
		1495.68	1495.57		-0.1069	-71	198	208	YYCFQGNQFLR			27	0	Carbamidomethyl (C)[3]						Mascot
		1495.68	1495.57		-0.1069	-71	198	208	YYCFQGNQFLR					Carbamidomethyl (C)[3]						Mascot
	6	hypothetical protein [Homo sapiens]										gi|34364651		51691.8	8.13	7	55		19.183	32	46.844
		Peptide Information
		Calc. Mass		Obsrv. Mass	± da	± ppm	Start	End	Sequence			Ion	C. I. %	Modification					Rank	Result Type
							Seq.	Seq.				Score
		838.503	838.451		-0.0521	-62	352	359	ALPAPIEK											Mascot
		1037.54	1037.44		-0.0929	-90	87	95	FTISRDNGK											Mascot
		1286.67	1286.58		-0.0987	-77	370	380	EPQVYTLPPSR											Mascot
		1677.8	1677.7		-0.1049	-63	300	313	FNWYVDGVEVHNAK											Mascot
		1872.97	1872.82		-0.1529	-82	370	385	EPQVYTLPPSRDELTK											Mascot
		1872.97	1872.82		-0.1529	-82	370	385	EPQVYTLPPSRDELTK			32	46.844							Mascot
		2192.95	2192.96		0.0112	5	39	57	LSCAASGFTFDDYAMHW					Oxidation (M)[15]						Mascot
									VR
		2807.4	2807.1		-0.2969	-106	58	84	QAPGKGLEWVSGISWNS											Mascot
									GSIAYADSVK
	7	hypothetical protein [Homo sapiens]										gi|34365282		52010	8.31	7	55		19.183	32	46.844
		Peptide Information
		Calc. Mass		Obsrv. Mass	± da	± ppm	Start	End	Sequence			Ion	C. I. %	Modification					Rank	Result Type
							Seq.	Seq.				Score
		838.503	838.451		-0.0521	-62	355	362	ALPAPIEK											Mascot
		1286.67	1286.58		-0.0987	-77	373	383	EPQVYTLPPSR											Mascot
		1677.8	1677.7		-0.1049	-63	303	316	FNWYVDGVEVHNAK											Mascot
		1872.97	1872.82		-0.1529	-82	373	388	EPQVYTLPPSRDELTK											Mascot
		1872.97	1872.82		-0.1529	-82	373	388	EPQVYTLPPSRDELTK			32	46.844							Mascot
		2194.03	2193.96		-0.0694	-32	39	57	LSCAASGFTFRNYAMNW											Mascot
									VR
		2283.18	2282.98		-0.1994	-87	16	38	GVQCEVQLLESGGGLVQ											Mascot
									PGGSLR
		2313.15	2312.99		-0.168	-73	87	106	FTISGDISTNTLYLQMHSL					Oxidation (M)[16]						Mascot
									R
	8	vesicle transport-related protein isoform a variant										gi|62897199		72262	5.98	13	51		0
		[Homo sapiens]
		Peptide Information
		Calc. Mass		Obsrv. Mass	± da	± ppm	Start	End	Sequence			Ion	C. I. %	Modification					Rank	Result Type
							Seq.	Seq.				Score
		838.355	838.451		0.0965	115	102	107	MCQDLR					Carbamidomethyl (C)[2], Oxidation (M)[1]						Mascot
		1037.52	1037.44		-0.0704	-68	316	324	SYDLTPVDK											Mascot
		1106.56	1106.45		-0.1122	-101	550	558	ILDNLMEMK											Mascot
		1165.61	1165.64		0.0298	26	315	324	KSYDLTPVDK											Mascot
		1165.61	1165.64		0.0298	26	315	324	KSYDLTPVDK											Mascot
		1334.62	1334.76		0.1451	109	418	427	LDVYFEYEEK											Mascot
		1404.73	1404.56		-0.1633	-116	1	16	MAAAAAATAAAAASIR					Oxidation (M)[1]						Mascot
		1940.97	1940.76		-0.2029	-105	292	310	VNLEESSGVENSPAGAR											Mascot
									PK
		2211.14	2210.91		-0.2233	-101	26	44	MLNFNVPHIKNSTGEPV											Mascot
									WK
		2211.14	2210.91		-0.2233	-101	26	44	MLNFNVPHIKNSTGEPV											Mascot
									WK
		2225.15	2224.93		-0.2217	-100	615	634	QGKHILYGCSGLFNATQF											Mascot
									IK
		2225.15	2224.93		-0.2217	-100	615	634	QGKHILYGCSGLFNATQF											Mascot
									IK
		2233.14	2232.9		-0.24	-107	479	497	ALTDAGCNLNPLQYIKQ					Carbamidomethyl (C)[7]						Mascot
									WK
		2282.18	2281.99		-0.187	-82	615	634	QGKHILYGCSGLFNATQF					Carbamidomethyl (C)[9]						Mascot
									IK
		2296.16	2295.97		-0.1887	-82	108	126	NQLYESYYLNFISAISRSK											Mascot
		2300.03	2299.97		-0.0606	-26	360	381	SIMGLEGEDEGAISMLSD					Oxidation (M)[3,15]						Mascot
									NTAK
		3339.7	3339.5		-0.207	-62	264	291	NIDLATPLHHTWTYQALV											Mascot
									HDVLDFHLNR
	9	IgG [Homo sapiens]										gi|185362		52060	8.6	6	50		0	32	46.844
		Peptide Information
		Calc. Mass		Obsrv. Mass	± da	± ppm	Start	End	Sequence			Ion	C. I. %	Modification					Rank	Result Type
							Seq.	Seq.				Score
		838.503	838.451		-0.0521	-62	356	363	ALPAPIEK											Mascot
		1286.67	1286.58		-0.0987	-77	374	384	EPQVYTLPPSR											Mascot
		1493.62	1493.61		-0.0078	-5	107	119	SEDTAVYYCATDR											Mascot
		1677.8	1677.7		-0.1049	-63	304	317	FNWYVDGVEVHNAK											Mascot
		1872.97	1872.82		-0.1529	-82	374	389	EPQVYTLPPSRDELTK											Mascot
		1872.97	1872.82		-0.1529	-82	374	389	EPQVYTLPPSRDELTK			32	46.844							Mascot
		3354.69	3354.5		-0.1965	-59	2	31	DWTWRFLFVVAAATGVQ					Oxidation (M)[20]						Mascot
									SQMQVVQSGAEVK
	10	immunoglobulin gamma-1 heavy chain constant region										gi|19717684		24381.3	7.38	4	49		0	32	46.844
		[Homo sapiens]
		Peptide Information
		Calc. Mass		Obsrv. Mass	± da	± ppm	Start	End	Sequence			Ion	C. I. %	Modification					Rank	Result Type
							Seq.	Seq.				Score
		838.503	838.451		-0.0521	-62	96	103	ALPAPIEK											Mascot
		1286.67	1286.58		-0.0987	-77	114	124	EPQVYTLPPSR											Mascot
		1677.8	1677.7		-0.1049	-63	44	57	FNWYVDGVEVHNAK											Mascot
		1872.97	1872.82		-0.1529	-82	114	129	EPQVYTLPPSRDELTK											Mascot
		1872.97	1872.82		-0.1529	-82	114	129	EPQVYTLPPSRDELTK			32	43.088							Mascot
Gel Idx/Pos			59/C8						Instr./Gel Origin		BA2060/110322A					Process Status		Analysis Succeeded
Plate [#] Name			[1] 22987						Instrument Sample Name							Spectra		11
Rank		Protein Name						Species				Accession No.		Protein MW	Protein	Pep.		Protein	Protein	Total Ion	Total Ion
															PI	Count		Score	Score	Score	C. I. %
																			C. I. %
	1	hypothetical protein [Homo sapiens]										gi|34365089		52387.1	7.89	5	140		100	128	100
		Peptide Information
		Calc. Mass		Obsrv. Mass	± da	± ppm	Start	End	Sequence			Ion	C. I. %	Modification					Rank	Result Type
							Seq.	Seq.				Score
		824.4	824.42		0.0195	24	2	7	ELMCKK					Carbamidomethyl (C)[4], Oxidation (M)[3]						Mascot
		882.425	882.492		0.0669	76	1	7	MELMCKK											Mascot
		1858.06	1857.79		-0.2704	-146	8	22	MKHLWFFLLLVAAPR					Oxidation (M)[1]						Mascot
		1892.89	1892.72		-0.1703	-90	374	389	EPQVYTLPPSQEEMTK					Oxidation (M)[14]						Mascot
		1901.93	1901.77		-0.1555	-82	422	438	TTPPVLDSDGSFFLYSR			128	100							Mascot
		1901.93	1901.77		-0.1555	-82	422	438	TTPPVLDSDGSFFLYSR											Mascot
	2	immunoglobulin heavy chain constant region gamma 4										gi|12054078		36091.9	7.16	3	137		100	128	100
		[Homo sapiens]
		Peptide Information
		Calc. Mass		Obsrv. Mass	± da	± ppm	Start	End	Sequence			Ion	C. I. %	Modification					Rank	Result Type
							Seq.	Seq.				Score
		1892.89	1892.72		-0.1703	-90	225	240	EPQVYTLPPSQEEMTK					Oxidation (M)[14]						Mascot
		1901.93	1901.77		-0.1555	-82	273	289	TTPPVLDSDGSFFLYSR			128	100							Mascot
		1901.93	1901.77		-0.1555	-82	273	289	TTPPVLDSDGSFFLYSR											Mascot
		2720.37	2720.05		-0.3213	-118	5	30	GPSVFPLVPCSRSTSEST					Carbamidomethyl (C)[10,23]						Mascot
									AALGCLVK
	3	recombinant IgG4 heavy chain [Homo sapiens]										gi|9857759		42894.8	5.72	3	135		100	128	100
		Peptide Information
		Calc. Mass		Obsrv. Mass	± da	± ppm	Start	End	Sequence			Ion	C. I. %	Modification					Rank	Result Type
							Seq.	Seq.				Score
		842.452	842.442		-0.0103	-12	1	6	YTQRFK											Mascot
		1892.89	1892.72		-0.1703	-90	287	302	EPQVYTLPPSQEEMTK					Oxidation (M)[14]						Mascot
		1901.93	1901.77		-0.1555	-82	335	351	TTPPVLDSDGSFFLYSR			128	100							Mascot
		1901.93	1901.77		-0.1555	-82	335	351	TTPPVLDSDGSFFLYSR											Mascot
	4	Chain A, Crystal Structure Of A Human Igm										gi|3659940		23442.7	7.34	2	135		100	128	100
		Rheumatoid Factor Fab In Complex With Its
		Autoantigen Igg
		Peptide Information
		Calc. Mass		Obsrv. Mass	± da	± ppm	Start	End	Sequence			Ion	C. I. %	Modification					Rank	Result Type
							Seq.	Seq.				Score
		1892.89	1892.72		-0.1703	-90	108	123	EPQVYTLPPSQEEMTK					Oxidation (M)[14]						Mascot
		1901.93	1901.77		-0.1555	-82	156	172	TTPPVLDSDGSFFLYSR			128	100							Mascot
		1901.93	1901.77		-0.1555	-82	156	172	TTPPVLDSDGSFFLYSR											Mascot
	5	immunoglobulin heavy chain, constant region [Homo										gi|2414492		25733.7	6	2	134		100	128	100
		sapiens]
		Peptide Information
		Calc. Mass		Obsrv. Mass	± da	± ppm	Start	End	Sequence			Ion	C. I. %	Modification					Rank	Result Type
							Seq.	Seq.				Score
		1892.89	1892.72		-0.1703	-90	127	142	EPQVYTLPPSQEEMTK					Oxidation (M)[14]						Mascot
		1901.93	1901.77		-0.1555	-82	175	191	TTPPVLDSDGSFFLYSR			128	100							Mascot
		1901.93	1901.77		-0.1555	-82	175	191	TTPPVLDSDGSFFLYSR											Mascot
	6	unnamed protein product [Homo sapiens]										gi|34535866		52125.9	7.89	3	134		100	128	100
		Peptide Information
		Calc. Mass		Obsrv. Mass	± da	± ppm	Start	End	Sequence			Ion	C. I. %	Modification					Rank	Result Type
							Seq.	Seq.				Score
		1892.89	1892.72		-0.1703	-90	373	388	EPQVYTLPPSQEEMTK					Oxidation (M)[14]						Mascot
		1901.93	1901.77		-0.1555	-82	421	437	TTPPVLDSDGSFFLYSR			128	100							Mascot
		1901.93	1901.77		-0.1555	-82	421	437	TTPPVLDSDGSFFLYSR											Mascot
		1911.03	1910.78		-0.2578	-135	58	76	QAPGLGLEWVAVVSKDG											Mascot
									GK
	7	RecName: Full=Ig gamma-4 chain C region										gi|121047		35917.9	7.18	2	133		100	128	100
		Peptide Information
		Calc. Mass		Obsrv. Mass	± da	± ppm	Start	End	Sequence			Ion	C. I. %	Modification					Rank	Result Type
							Seq.	Seq.				Score
		1892.89	1892.72		-0.1703	-90	225	240	EPQVYTLPPSQEEMTK					Oxidation (M)[14]						Mascot
		1901.93	1901.77		-0.1555	-82	273	289	TTPPVLDSDGSFFLYSR			128	100							Mascot
		1901.93	1901.77		-0.1555	-82	273	289	TTPPVLDSDGSFFLYSR											Mascot
	8	Ig gamma 2 H chain, BUR [human, Peptide Mutant, 348										gi|243169		38698.4	6.22	7	92		99.987	68	99.983
		aa]
		Peptide Information
		Calc. Mass		Obsrv. Mass	± da	± ppm	Start	End	Sequence			Ion	C. I. %	Modification					Rank	Result Type
							Seq.	Seq.				Score
		824.488	824.42		-0.0676	-82	229	236	GLPAPIEK											Mascot
		864.473	864.485		0.0124	14	32	38	FGISWVR											Mascot
		1265.61	1265.56		-0.0472	-37	56	66	NETRADFGDLK											Mascot
		1286.67	1286.57		-0.1063	-83	247	257	EPQVYTLPPSR											Mascot
		1286.67	1286.57		-0.1063	-83	247	257	EPQVYTLPPSR			60	99.904							Mascot
		1334.57	1334.76		0.1962	147	90	100	SDDTAIYYCAR					Carbamidomethyl (C)[9]						Mascot
		1639.82	1639.67		-0.146	-89	191	203	TKPREEQFNSTFR											Mascot
		1639.82	1639.79		-0.0249	-15	191	203	TKPREEQFNSTFR											Mascot
		1920.94	1920.77		-0.1644	-86	247	262	EPQVYTLPPSREEMTK			8	0	Oxidation (M)[14]						Mascot
		1920.94	1920.77		-0.1644	-86	247	262	EPQVYTLPPSREEMTK					Oxidation (M)[14]						Mascot
	9	hypothetical protein [Homo sapiens]										gi|34365168		51066.2	7.85	6	84		99.915	68	99.983
		Peptide Information
		Calc. Mass		Obsrv. Mass	± da	± ppm	Start	End	Sequence			Ion	C. I. %	Modification					Rank	Result Type
							Seq.	Seq.				Score
		824.488	824.42		-0.0676	-82	344	351	GLPAPIEK											Mascot
		1051.55	1051.62		0.0686	65	88	96	FTISRDNAK											Mascot
		1051.55	1051.62		0.0686	65	88	96	FTISRDNAK											Mascot
		1286.67	1286.57		-0.1063	-83	362	372	EPQVYTLPPSR											Mascot
		1286.67	1286.57		-0.1063	-83	362	372	EPQVYTLPPSR			60	99.904							Mascot
		1639.82	1639.67		-0.146	-89	306	318	TKPREEQFNSTFR											Mascot
		1639.82	1639.79		-0.0249	-15	306	318	TKPREEQFNSTFR											Mascot
		1920.94	1920.77		-0.1644	-86	362	377	EPQVYTLPPSREEMTK			8	0	Oxidation (M)[14]						Mascot
		1920.94	1920.77		-0.1644	-86	362	377	EPQVYTLPPSREEMTK					Oxidation (M)[14]						Mascot
		2720.37	2720.05		-0.3213	-118	143	168	GPSVFPLAPCSRSTSEST					Carbamidomethyl (C)[10,23]						Mascot
									VALGCLVK
	10	hCG2003479 [Homo sapiens]										gi|119571258		22314	6.59	4	83		99.886	68	99.983
		Peptide Information
		Calc. Mass		Obsrv. Mass	± da	± ppm	Start	End	Sequence			Ion	C. I. %	Modification					Rank	Result Type
							Seq.	Seq.				Score
		824.488	824.42		-0.0676	-82	76	83	GLPAPIEK											Mascot
		1286.67	1286.57		-0.1063	-83	94	104	EPQVYTLPPSR											Mascot
		1286.67	1286.57		-0.1063	-83	94	104	EPQVYTLPPSR			60	99.904							Mascot
		1639.82	1639.67		-0.146	-89	38	50	TKPREEQFNSTFR											Mascot
		1639.82	1639.79		-0.0249	-15	38	50	TKPREEQFNSTFR											Mascot
		1920.94	1920.77		-0.1644	-86	94	109	EPQVYTLPPSREEMTK			8	0	Oxidation (M)[14]						Mascot
		1920.94	1920.77		-0.1644	-86	94	109	EPQVYTLPPSREEMTK					Oxidation (M)[14]						Mascot
Gel Idx/Pos			60/C9						Instr./Gel Origin		BA2060/110322A					Process Status		Analysis Succeeded
Plate [#] Name			[1] 22987						Instrument Sample Name							Spectra		11
Rank		Protein Name						Species				Accession No.		Protein MW	Protein	Pep.		Protein	Protein	Total Ion	Total Ion
															PI	Count		Score	Score	Score	C. I. %
																			C. I. %
	1	hypothetical protein [Homo sapiens]										gi|34365089		52387.1	7.89	5	109		100	96	100
		Peptide Information
		Calc. Mass		Obsrv. Mass	± da	± ppm	Start	End	Sequence			Ion	C. I. %	Modification					Rank	Result Type
							Seq.	Seq.				Score
		824.4	824.415		0.0141	17	2	7	ELMCKK					Carbamidomethyl (C)[4], Oxidation (M)[3]						Mascot
		851.429	851.356		-0.0733	-86	278	284	DTLMISR					Oxidation (M)[4]						Mascot
		882.425	882.486		0.0612	69	1	7	MELMCKK											Mascot
		1161.63	1161.52		-0.1123	-97	390	399	NQVSLTCLVK					Carbamidomethyl (C)[7]						Mascot
		1901.93	1901.76		-0.1719	-90	422	438	TTPPVLDSDGSFFLYSR											Mascot
		1901.93	1901.76		-0.1719	-90	422	438	TTPPVLDSDGSFFLYSR			96	100							Mascot
	2	Chain A, Crystal Structure Of A Human Igm										gi|3659940		23442.7	7.34	3	108		100	96	100
		Rheumatoid Factor Fab In Complex With Its
		Autoantigen Igg
		Peptide Information
		Calc. Mass		Obsrv. Mass	± da	± ppm	Start	End	Sequence			Ion	C. I. %	Modification					Rank	Result Type
							Seq.	Seq.				Score
		851.429	851.356		-0.0733	-86	12	18	DTLMISR					Oxidation (M)[4]						Mascot
		1161.63	1161.52		-0.1123	-97	124	133	NQVSLTCLVK					Carbamidomethyl (C)[7]						Mascot
		1901.93	1901.76		-0.1719	-90	156	172	TTPPVLDSDGSFFLYSR											Mascot
		1901.93	1901.76		-0.1719	-90	156	172	TTPPVLDSDGSFFLYSR			96	100							Mascot
	3	recombinant IgG4 heavy chain [Homo sapiens]										gi|9857759		42894.8	5.72	4	107		100	96	100
		Peptide Information
		Calc. Mass		Obsrv. Mass	± da	± ppm	Start	End	Sequence			Ion	C. I. %	Modification					Rank	Result Type
							Seq.	Seq.				Score
		842.452	842.438		-0.014	-17	1	6	YTQRFK											Mascot
		851.429	851.356		-0.0733	-86	191	197	DTLMISR					Oxidation (M)[4]						Mascot
		1161.63	1161.52		-0.1123	-97	303	312	NQVSLTCLVK					Carbamidomethyl (C)[7]						Mascot
		1901.93	1901.76		-0.1719	-90	335	351	TTPPVLDSDGSFFLYSR											Mascot
		1901.93	1901.76		-0.1719	-90	335	351	TTPPVLDSDGSFFLYSR			96	100							Mascot
	4	immunoglobulin heavy chain, constant region [Homo										gi|2414492		25733.7	6	3	107		100	96	100
		sapiens]
		Peptide Information
		Calc. Mass		Obsrv. Mass	± da	± ppm	Start	End	Sequence			Ion	C. I. %	Modification					Rank	Result Type
							Seq.	Seq.				Score
		851.429	851.356		-0.0733	-86	31	37	DTLMISR					Oxidation (M)[4]						Mascot
		1161.63	1161.52		-0.1123	-97	143	152	NQVSLTCLVK					Carbamidomethyl (C)[7]						Mascot
		1901.93	1901.76		-0.1719	-90	175	191	TTPPVLDSDGSFFLYSR											Mascot
		1901.93	1901.76		-0.1719	-90	175	191	TTPPVLDSDGSFFLYSR			96	100							Mascot
	5	unnamed protein product [Homo sapiens]										gi|34535866		52125.9	7.89	4	107		100	96	100
		Peptide Information
		Calc. Mass		Obsrv. Mass	± da	± ppm	Start	End	Sequence			Ion	C. I. %	Modification					Rank	Result Type
							Seq.	Seq.				Score
		851.429	851.356		-0.0733	-86	277	283	DTLMISR					Oxidation (M)[4]						Mascot
		1161.63	1161.52		-0.1123	-97	389	398	NQVSLTCLVK					Carbamidomethyl (C)[7]						Mascot
		1901.93	1901.76		-0.1719	-90	421	437	TTPPVLDSDGSFFLYSR											Mascot
		1901.93	1901.76		-0.1719	-90	421	437	TTPPVLDSDGSFFLYSR			96	100							Mascot
		3807.98	3808.54		0.5545	146	1	35	MEFGLSWVFLVALFRGV					Oxidation (M)[1]						Mascot
									QCQVQLVQSGGGVVQP
									GR
	6	recombinant IgG2 heavy chain [Homo sapiens]										gi|14030849		49487.8	7.94	8	105		100	76	99.998
		Peptide Information
		Calc. Mass		Obsrv. Mass	± da	± ppm	Start	End	Sequence			Ion	C. I. %	Modification					Rank	Result Type
							Seq.	Seq.				Score
		824.488	824.415		-0.073	-89	327	334	GLPAPIEK											Mascot
		842.452	842.438		-0.014	-17	60	65	YTQRFK											Mascot
		851.429	851.356		-0.0733	-86	249	255	DTLMISR					Oxidation (M)[4]						Mascot
		1161.63	1161.52		-0.1123	-97	361	370	NQVSLTCLVK					Carbamidomethyl (C)[7]						Mascot
		1286.67	1286.56		-0.1109	-86	345	355	EPQVYTLPPSR			66	99.978							Mascot
		1286.67	1286.56		-0.1109	-86	345	355	EPQVYTLPPSR											Mascot
		1639.82	1639.64		-0.1821	-111	289	301	TKPREEQFNSTFR											Mascot
		1920.94	1920.75		-0.1838	-96	345	360	EPQVYTLPPSREEMTK			10	0	Oxidation (M)[14]						Mascot
		1920.94	1920.75		-0.1838	-96	345	360	EPQVYTLPPSREEMTK					Oxidation (M)[14]						Mascot
		2295.07	2294.95		-0.1184	-52	20	38	MSCKASGYSFTSYWLHW											Mascot
									IK
	7	immunoglobulin heavy chain constant region gamma 4										gi|12054078		36091.9	7.16	3	105		100	96	100
		[Homo sapiens]
		Peptide Information
		Calc. Mass		Obsrv. Mass	± da	± ppm	Start	End	Sequence			Ion	C. I. %	Modification					Rank	Result Type
							Seq.	Seq.				Score
		851.429	851.356		-0.0733	-86	129	135	DTLMISR					Oxidation (M)[4]						Mascot
		1161.63	1161.52		-0.1123	-97	241	250	NQVSLTCLVK					Carbamidomethyl (C)[7]						Mascot
		1901.93	1901.76		-0.1719	-90	273	289	TTPPVLDSDGSFFLYSR											Mascot
		1901.93	1901.76		-0.1719	-90	273	289	TTPPVLDSDGSFFLYSR			96	100							Mascot
	8	Ig gamma 2 H chain, BUR [human, Peptide Mutant, 348										gi|243169		38698.4	6.22	7	101		99.998	76	99.998
		aa]
		Peptide Information
		Calc. Mass		Obsrv. Mass	± da	± ppm	Start	End	Sequence			Ion	C. I. %	Modification					Rank	Result Type
							Seq.	Seq.				Score
		824.488	824.415		-0.073	-89	229	236	GLPAPIEK											Mascot
		851.429	851.356		-0.0733	-86	151	157	DTLMISR					Oxidation (M)[4]						Mascot
		864.473	864.455		-0.0174	-20	32	38	FGISWVR											Mascot
		1161.63	1161.52		-0.1123	-97	263	272	NQVSLTCLVK					Carbamidomethyl (C)[7]						Mascot
		1286.67	1286.56		-0.1109	-86	247	257	EPQVYTLPPSR			66	99.978							Mascot
		1286.67	1286.56		-0.1109	-86	247	257	EPQVYTLPPSR											Mascot
		1639.82	1639.64		-0.1821	-111	191	203	TKPREEQFNSTFR											Mascot
		1920.94	1920.75		-0.1838	-96	247	262	EPQVYTLPPSREEMTK			10	0	Oxidation (M)[14]						Mascot
		1920.94	1920.75		-0.1838	-96	247	262	EPQVYTLPPSREEMTK					Oxidation (M)[14]						Mascot
	9	hypothetical protein [Homo sapiens]										gi|34365168		51066.2	7.85	8	101		99.998	76	99.998
		Peptide Information
		Calc. Mass		Obsrv. Mass	± da	± ppm	Start	End	Sequence			Ion	C. I. %	Modification					Rank	Result Type
							Seq.	Seq.				Score
		824.488	824.415		-0.073	-89	344	351	GLPAPIEK											Mascot
		851.429	851.356		-0.0733	-86	266	272	DTLMISR					Oxidation (M)[4]						Mascot
		1051.55	1051.61		0.0588	56	88	96	FTISRDNAK											Mascot
		1161.63	1161.52		-0.1123	-97	378	387	NQVSLTCLVK					Carbamidomethyl (C)[7]						Mascot
		1286.67	1286.56		-0.1109	-86	362	372	EPQVYTLPPSR			66	99.978							Mascot
		1286.67	1286.56		-0.1109	-86	362	372	EPQVYTLPPSR											Mascot
		1639.82	1639.64		-0.1821	-111	306	318	TKPREEQFNSTFR											Mascot
		1920.94	1920.75	1920.75	-0.1838	-96	362	377	EPQVYTLPPSREEMTK			10	0	Oxidation (M)[14]						Mascot	Mascot
		1920.94	1920.75		-0.1838	-96	362	377	EPQVYTLPPSREEMTK					Oxidation (M)[14]						Mascot
		3339.81	3339.47		-0.3457	-104	7	38	WVFLVAILEGVQCEVQLV											Mascot
									ESGGGLVKPGGSLR
	10	Unknown (protein for MGC:105008) [Homo sapiens]										gi|59807832		56776.8	6.43	8	101		99.998	76	99.998
		Peptide Information
		Calc. Mass		Obsrv. Mass	± da	± ppm	Start	End	Sequence			Ion	C. I. %	Modification					Rank	Result Type
							Seq.	Seq.				Score
		851.429	851.356		-0.0733	-86	321	327	DTLMISR					Oxidation (M)[4]						Mascot
		868.344	868.465		0.1209	139	1	6	MDCTWR					Carbamidomethyl (C)[3]						Mascot
		1161.63	1161.52		-0.1123	-97	433	442	NQVSLTCLVK					Carbamidomethyl (C)[7]						Mascot
		1286.67	1286.56		-0.1109	-86	417	427	EPQVYTLPPSR			66	99.978							Mascot
		1286.67	1286.56		-0.1109	-86	417	427	EPQVYTLPPSR											Mascot
		1920.94	1920.75		-0.1838	-96	417	432	EPQVYTLPPSREEMTK			10	0	Oxidation (M)[14]						Mascot
		1920.94	1920.75		-0.1838	-96	417	432	EPQVYTLPPSREEMTK					Oxidation (M)[14]						Mascot
		2296	2295.95		-0.0447	-19	87	106	VTMTEDTSTDTAYMDLS					Oxidation (M)[3,14]						Mascot
									NLR
		2314.06	2313.96		-0.1001	-43	489	507	WQQGNIFSCSVMHEALH					Carbamidomethyl (C)[9]						Mascot
									NR
		3353.77	3353.47		-0.3052	-91	1	31	MDCTWRILLLVAVATGTH					Oxidation (M)[1]						Mascot
									AQVQLVQSGAEVK
		3353.77	3353.47		-0.3052	-91	1	31	MDCTWRILLLVAVATGTH					Oxidation (M)[1]						Mascot
									AQVQLVQSGAEVK
Gel Idx/Pos			61/C10						Instr./Gel Origin		BA2060/110322A					Process Status		Analysis Succeeded
Plate [#] Name			[1] 22987						Instrument Sample Name							Spectra		11
Rank		Protein Name						Species				Accession No.		Protein MW	Protein	Pep.		Protein	Protein	Total Ion	Total Ion
															PI	Count		Score	Score	Score	C. I. %
																			C. I. %
	1	hypothetical protein [Homo sapiens]										gi|34365089		52387.1	7.89	3	101		99.998	94	100
		Peptide Information
		Calc. Mass		Obsrv. Mass	± da	± ppm	Start	End	Sequence			Ion	C. I. %	Modification					Rank	Result Type
							Seq.	Seq.				Score
		824.4	824.413		0.0121	15	2	7	ELMCKK					Carbamidomethyl (C)[4], Oxidation (M)[3]						Mascot
		882.425	882.483		0.0581	66	1	7	MELMCKK											Mascot
		1901.93	1901.75		-0.1785	-94	422	438	TTPPVLDSDGSFFLYSR											Mascot
		1901.93	1901.75		-0.1785	-94	422	438	TTPPVLDSDGSFFLYSR			94	100							Mascot
	2	immunoglobulin heavy chain constant region gamma 4										gi|12054078		36091.9	7.16	2	100		99.998	94	100
		[Homo sapiens]
		Peptide Information
		Calc. Mass		Obsrv. Mass	± da	± ppm	Start	End	Sequence			Ion	C. I. %	Modification					Rank	Result Type
							Seq.	Seq.				Score
		1901.93	1901.75		-0.1785	-94	273	289	TTPPVLDSDGSFFLYSR											Mascot
		1901.93	1901.75		-0.1785	-94	273	289	TTPPVLDSDGSFFLYSR			94	100							Mascot
		2720.37	2720.03		-0.3474	-128	5	30	GPSVFPLVPCSRSTSEST					Carbamidomethyl (C)[10,23]						Mascot
									AALGCLVK
	3	recombinant IgG4 heavy chain [Homo sapiens]										gi|9857759		42894.8	5.72	2	100		99.997	94	100
		Peptide Information
		Calc. Mass		Obsrv. Mass	± da	± ppm	Start	End	Sequence			Ion	C. I. %	Modification					Rank	Result Type
							Seq.	Seq.				Score
		842.452	842.434		-0.0177	-21	1	6	YTQRFK											Mascot
		1901.93	1901.75		-0.1785	-94	335	351	TTPPVLDSDGSFFLYSR											Mascot
		1901.93	1901.75		-0.1785	-94	335	351	TTPPVLDSDGSFFLYSR			94	100							Mascot
	4	Chain A, Crystal Structure Of A Human Igm										gi|3659940		23442.7	7.34	1	98		99.996	94	100
		Rheumatoid Factor Fab In Complex With Its
		Autoantigen Igg
		Peptide Information
		Calc. Mass		Obsrv. Mass	± da	± ppm	Start	End	Sequence			Ion	C. I. %	Modification					Rank	Result Type
							Seq.	Seq.				Score
		1901.93	1901.75		-0.1785	-94	156	172	TTPPVLDSDGSFFLYSR											Mascot
		1901.93	1901.75		-0.1785	-94	156	172	TTPPVLDSDGSFFLYSR			94	100							Mascot
	5	immunoglobulin gamma-4 heavy chain [Homo sapiens]										gi|184759		35846.8	7.01	1	94		99.991	94	100
		Peptide Information
		Calc. Mass		Obsrv. Mass	± da	± ppm	Start	End	Sequence			Ion	C. I. %	Modification					Rank	Result Type
							Seq.	Seq.				Score
		1901.93	1901.75		-0.1785	-94	272	288	TTPPVLDSDGSFFLYSR											Mascot
		1901.93	1901.75		-0.1785	-94	272	288	TTPPVLDSDGSFFLYSR			94	100							Mascot
	6	unnamed protein product [Homo sapiens]										gi|34535866		52125.9	7.89	2	94		99.991	94	100
		Peptide Information
		Calc. Mass		Obsrv. Mass	± da	± ppm	Start	End	Sequence			Ion	C. I. %	Modification					Rank	Result Type
							Seq.	Seq.				Score
		1901.93	1901.75		-0.1785	-94	421	437	TTPPVLDSDGSFFLYSR											Mascot
		1901.93	1901.75		-0.1785	-94	421	437	TTPPVLDSDGSFFLYSR			94	100							Mascot
		3807.98	3808.53		0.5445	143	1	35	MEFGLSWVFLVALFRGV					Oxidation (M)[1]						Mascot
									QCQVQLVQSGGGVVQP
									GR
	7	Ig gamma 2 H chain, BUR [human, Peptide Mutant, 348										gi|243169		38698.4	6.22	7	92		99.984	63	99.957
		aa]
		Peptide Information
		Calc. Mass		Obsrv. Mass	± da	± ppm	Start	End	Sequence			Ion	C. I. %	Modification					Rank	Result Type
							Seq.	Seq.				Score
		824.488	824.413		-0.075	-91	229	236	GLPAPIEK											Mascot
		864.473	864.465		-0.0078	-9	32	38	FGISWVR											Mascot
		1265.61	1265.55		-0.0583	-46	56	66	NETRADFGDLK											Mascot
		1286.67	1286.56		-0.1165	-91	247	257	EPQVYTLPPSR											Mascot
		1286.67	1286.56		-0.1165	-91	247	257	EPQVYTLPPSR			63	99.957							Mascot
		1334.57	1334.75		0.1835	137	90	100	SDDTAIYYCAR					Carbamidomethyl (C)[9]						Mascot
		1639.82	1639.7		-0.1198	-73	191	203	TKPREEQFNSTFR											Mascot
		1920.94	1920.75		-0.1913	-100	247	262	EPQVYTLPPSREEMTK					Oxidation (M)[14]						Mascot
		1920.94	1920.75		-0.1913	-100	247	262	EPQVYTLPPSREEMTK			4	0	Oxidation (M)[14]						Mascot
	8	hypothetical protein [Homo sapiens]										gi|34365168		51066.2	7.85	7	90		99.978	63	99.957
		Peptide Information
		Calc. Mass		Obsrv. Mass	± da	± ppm	Start	End	Sequence			Ion	C. I. %	Modification					Rank	Result Type
							Seq.	Seq.				Score
		824.488	824.413		-0.075	-91	344	351	GLPAPIEK											Mascot
		1051.55	1051.61		0.0576	55	88	96	FTISRDNAK											Mascot
		1051.55	1051.61		0.0576	55	88	96	FTISRDNAK											Mascot
		1286.67	1286.56		-0.1165	-91	362	372	EPQVYTLPPSR											Mascot
		1286.67	1286.56		-0.1165	-91	362	372	EPQVYTLPPSR			63	99.957							Mascot
		1639.82	1639.7		-0.1198	-73	306	318	TKPREEQFNSTFR											Mascot
		1920.94	1920.75		-0.1913	-100	362	377	EPQVYTLPPSREEMTK					Oxidation (M)[14]						Mascot
		1920.94	1920.75		-0.1913	-100	362	377	EPQVYTLPPSREEMTK			4	0	Oxidation (M)[14]						Mascot
		2720.37	2720.03		-0.3474	-128	143	168	GPSVFPLAPCSRSTSEST					Carbamidomethyl (C)[10,23]						Mascot
									VALGCLVK
		3339.81	3339.45		-0.3589	-107	7	38	WVFLVAILEGVQCEVQLV											Mascot
									ESGGGLVKPGGSLR
	9	recombinant IgG2 heavy chain [Homo sapiens]										gi|14030849		49487.8	7.94	6	85		99.928	63	99.957
		Peptide Information
		Calc. Mass		Obsrv. Mass	± da	± ppm	Start	End	Sequence			Ion	C. I. %	Modification					Rank	Result Type
							Seq.	Seq.				Score
		824.488	824.413		-0.075	-91	327	334	GLPAPIEK											Mascot
		842.452	842.434		-0.0177	-21	60	65	YTQRFK											Mascot
		1286.67	1286.56		-0.1165	-91	345	355	EPQVYTLPPSR											Mascot
		1286.67	1286.56		-0.1165	-91	345	355	EPQVYTLPPSR			63	99.957							Mascot
		1639.82	1639.7		-0.1198	-73	289	301	TKPREEQFNSTFR											Mascot
		1920.94	1920.75		-0.1913	-100	345	360	EPQVYTLPPSREEMTK					Oxidation (M)[14]						Mascot
		1920.94	1920.75		-0.1913	-100	345	360	EPQVYTLPPSREEMTK			4	0	Oxidation (M)[14]						Mascot
		2295.07	2294.96		-0.1152	-50	20	38	MSCKASGYSFTSYWLHW											Mascot
									IK
	10	Unknown (protein for MGC:105008) [Homo sapiens]										gi|59807832		56776.8	6.43	6	83		99.891	63	99.957
		Peptide Information
		Calc. Mass		Obsrv. Mass	± da	± ppm	Start	End	Sequence			Ion	C. I. %	Modification					Rank	Result Type
							Seq.	Seq.				Score
		868.344	868.466		0.1222	141	1	6	MDCTWR					Carbamidomethyl (C)[3]						Mascot
		1286.67	1286.56		-0.1165	-91	417	427	EPQVYTLPPSR											Mascot
		1286.67	1286.56		-0.1165	-91	417	427	EPQVYTLPPSR			63	99.957							Mascot
		1920.94	1920.75		-0.1913	-100	417	432	EPQVYTLPPSREEMTK					Oxidation (M)[14]						Mascot
		1920.94	1920.75		-0.1913	-100	417	432	EPQVYTLPPSREEMTK			4	0	Oxidation (M)[14]						Mascot
		2296	2295.95		-0.0493	-21	87	106	VTMTEDTSTDTAYMDLS					Oxidation (M)[3,14]						Mascot
									NLR
		2314.06	2313.96		-0.104	-45	489	507	WQQGNIFSCSVMHEALH					Carbamidomethyl (C)[9]						Mascot
									NR
		3337.78	3337.47		-0.3028	-91	1	31	MDCTWRILLLVAVATGTH											Mascot
									AQVQLVQSGAEVK
		3353.77	3353.46		-0.3121	-93	1	31	MDCTWRILLLVAVATGTH					Oxidation (M)[1]						Mascot
									AQVQLVQSGAEVK
		3353.77	3353.46		-0.3121	-93	1	31	MDCTWRILLLVAVATGTH					Oxidation (M)[1]						Mascot
									AQVQLVQSGAEVK
Gel Idx/Pos			62/C11						Instr./Gel Origin		BA2060/110322A					Process Status		Analysis Succeeded
Plate [#] Name			[1] 22987						Instrument Sample Name							Spectra		11
Rank		Protein Name						Species				Accession No.		Protein MW	Protein	Pep.		Protein	Protein	Total Ion	Total Ion
															PI	Count		Score	Score	Score	C. I. %
																			C. I. %
	1	Chain A, Crystal Structure Of The Ga Module										gi|55669910		65178.2	5.57	26	722		100	569	100
		Complexed With Human Serum Albumin
		Peptide Information
		Calc. Mass		Obsrv. Mass	± da	± ppm	Start	End	Sequence			Ion	C. I. %	Modification					Rank	Result Type
							Seq.	Seq.				Score
		927.493	927.405		-0.088	-95	138	144	YLYEIAR											Mascot
		927.493	927.405		-0.088	-95	138	144	YLYEIAR			53	99.519							Mascot
		933.519	933.429		-0.09	-96	74	81	LCTVATLR					Carbamidomethyl (C)[2]						Mascot
		960.562	960.471		-0.0911	-95	403	410	FQNALLVR											Mascot
		960.562	960.471		-0.0911	-95	403	410	FQNALLVR			68	99.985							Mascot
		1074.54	1074.44		-0.0984	-92	182	190	LDELRDEGK											Mascot
		1149.58	1149.5		-0.0725	-63	1	10	DAHKSEVAHR											Mascot
		1149.62	1149.5		-0.1116	-97	42	51	LVNEVTEFAK			37	80.972							Mascot
		1226.61	1226.49		-0.1196	-98	11	20	FKDLGEENFK											Mascot
		1311.74	1311.62		-0.1241	-95	338	348	HPDYSVVLLLR											Mascot
		1358.63	1358.49		-0.1389	-102	546	557	AVMDDFAAFVEK					Oxidation (M)[3]						Mascot
		1358.63	1358.49		-0.1389	-102	546	557	AVMDDFAAFVEK			68	99.985	Oxidation (M)[3]						Mascot
		1450.53	1450.74		0.213	147	82	93	ETYGEMADCCAK					Carbamidomethyl (C)[9,10], Oxidation (M)[6]						Mascot
		1467.84	1467.7		-0.1415	-96	337	348	RHPDYSVVLLLR			87	100							Mascot
		1467.84	1467.7		-0.1415	-96	337	348	RHPDYSVVLLLR											Mascot
		1495.58	1495.56		-0.0153	-10	360	372	CCAAADPHECYAK					Carbamidomethyl (C)[1,2]						Mascot
		1511.84	1511.7		-0.1444	-96	415	428	VPQVSTPTLVEVSR											Mascot
		1627.8	1627.57		-0.2279	-140	263	276	YICENQDSISSKLK											Mascot
		1639.78	1639.63		-0.1543	-94	324	336	DVFLGMFLYEYAR					Oxidation (M)[6]						Mascot
		1639.78	1639.63		-0.1543	-94	324	336	DVFLGMFLYEYAR			14	0	Oxidation (M)[6]						Mascot
		1639.78	1639.78		-0.0009	-1	324	336	DVFLGMFLYEYAR					Oxidation (M)[6]						Mascot
		1657.75	1657.59		-0.1604	-97	390	402	QNCELFEQLGEYK					Carbamidomethyl (C)[3]						Mascot
		1714.8	1714.63		-0.1688	-98	94	106	QEPERNECFLQHK					Carbamidomethyl (C)[8]						Mascot
		1742.89	1742.72		-0.1773	-102	146	159	HPYFYAPELLFFAK											Mascot
		1899	1898.81		-0.1888	-99	146	160	HPYFYAPELLFFAKR											Mascot
		1910.93	1910.75		-0.1833	-96	485	500	RPCFSALEVDETYVPK			110	100	Carbamidomethyl (C)[3]						Mascot
		1910.93	1910.75		-0.1833	-96	485	500	RPCFSALEVDETYVPK					Carbamidomethyl (C)[3]						Mascot
		2045.1	2044.89		-0.2037	-100	373	389	VFDEFKPLVEEPQNLIK											Mascot
		2045.1	2044.89		-0.2037	-100	373	389	VFDEFKPLVEEPQNLIK			133	100							Mascot
		2193.96	2193.9		-0.0681	-31	74	93	LCTVATLRETYGEMADC					Oxidation (M)[14]						Mascot
									CAK
		2260.02	2259.8		-0.2222	-98	501	519	EFNAETFTFHADICTLSEK					Carbamidomethyl (C)[14]						Mascot
		2300.11	2299.93		-0.1722	-75	318	336	NYAEAKDVFLGMFLYEY											Mascot
									AR
		2545.17	2544.93		-0.2356	-93	501	521	EFNAETFTFHADICTLSEK					Carbamidomethyl (C)[14]						Mascot
									ER
		2794.35	2794.08		-0.2762	-99	115	137	LVRPEVDVMCTAFHDNE					Carbamidomethyl (C)[10], Oxidation (M)[9]						Mascot
									ETFLKK
	2	albumin, isoform CRA_h [Homo sapiens]										gi|119626071		68568.1	5.92	27	722		100	569	100
		Peptide Information
		Calc. Mass		Obsrv. Mass	± da	± ppm	Start	End	Sequence			Ion	C. I. %	Modification					Rank	Result Type
							Seq.	Seq.				Score
		927.493	927.405		-0.088	-95	162	168	YLYEIAR											Mascot
		927.493	927.405		-0.088	-95	162	168	YLYEIAR			53	99.519							Mascot
		933.519	933.429		-0.09	-96	98	105	LCTVATLR					Carbamidomethyl (C)[2]						Mascot
		960.562	960.471		-0.0911	-95	427	434	FQNALLVR											Mascot
		960.562	960.471		-0.0911	-95	427	434	FQNALLVR			68	99.985							Mascot
		1074.54	1074.44		-0.0984	-92	206	214	LDELRDEGK											Mascot
		1149.58	1149.5		-0.0725	-63	25	34	DAHKSEVAHR											Mascot
		1149.62	1149.5		-0.1116	-97	66	75	LVNEVTEFAK			37	80.972							Mascot
		1226.61	1226.49		-0.1196	-98	35	44	FKDLGEENFK											Mascot
		1311.74	1311.62		-0.1241	-95	362	372	HPDYSVVLLLR											Mascot
		1358.63	1358.49		-0.1389	-102	563	574	AVMDDFAAFVEK					Oxidation (M)[3]						Mascot
		1358.63	1358.49		-0.1389	-102	563	574	AVMDDFAAFVEK			68	99.985	Oxidation (M)[3]						Mascot
		1450.53	1450.74		0.213	147	106	117	ETYGEMADCCAK					Carbamidomethyl (C)[9,10], Oxidation (M)[6]						Mascot
		1467.84	1467.7		-0.1415	-96	361	372	RHPDYSVVLLLR			87	100							Mascot
		1467.84	1467.7		-0.1415	-96	361	372	RHPDYSVVLLLR											Mascot
		1495.58	1495.56		-0.0153	-10	384	396	CCAAADPHECYAK					Carbamidomethyl (C)[1,2]						Mascot
		1511.84	1511.7		-0.1444	-96	439	452	VPQVSTPTLVEVSR											Mascot
		1627.8	1627.57		-0.2279	-140	287	300	YICENQDSISSKLK											Mascot
		1639.78	1639.63		-0.1543	-94	348	360	DVFLGMFLYEYAR					Oxidation (M)[6]						Mascot
		1639.78	1639.63		-0.1543	-94	348	360	DVFLGMFLYEYAR			14	0	Oxidation (M)[6]						Mascot
		1639.78	1639.78		-0.0009	-1	348	360	DVFLGMFLYEYAR					Oxidation (M)[6]						Mascot
		1657.75	1657.59		-0.1604	-97	414	426	QNCELFEQLGEYK					Carbamidomethyl (C)[3]						Mascot
		1714.8	1714.63		-0.1688	-98	118	130	QEPERNECFLQHK					Carbamidomethyl (C)[8]						Mascot
		1742.89	1742.72		-0.1773	-102	170	183	HPYFYAPELLFFAK											Mascot
		1899	1898.81		-0.1888	-99	170	184	HPYFYAPELLFFAKR											Mascot
		1910.93	1910.75		-0.1833	-96	502	517	RPCFSALEVDETYVPK			110	100	Carbamidomethyl (C)[3]						Mascot
		1910.93	1910.75		-0.1833	-96	502	517	RPCFSALEVDETYVPK					Carbamidomethyl (C)[3]						Mascot
		1920.88	1920.74		-0.1363	-71	469	483	RMPCAEDYLCVLHEK					Carbamidomethyl (C)[4,10]						Mascot
		2045.1	2044.89		-0.2037	-100	397	413	VFDEFKPLVEEPQNLIK											Mascot
		2045.1	2044.89		-0.2037	-100	397	413	VFDEFKPLVEEPQNLIK			133	100							Mascot
		2193.96	2193.9		-0.0681	-31	98	117	LCTVATLRETYGEMADC					Oxidation (M)[14]						Mascot
									CAK
		2260.02	2259.8		-0.2222	-98	518	536	EFNAETFTFHADICTLSEK					Carbamidomethyl (C)[14]						Mascot
		2300.11	2299.93		-0.1722	-75	342	360	NYAEAKDVFLGMFLYEY											Mascot
									AR
		2545.17	2544.93		-0.2356	-93	518	538	EFNAETFTFHADICTLSEK					Carbamidomethyl (C)[14]						Mascot
									ER
		2794.35	2794.08		-0.2762	-99	139	161	LVRPEVDVMCTAFHDNE					Carbamidomethyl (C)[10], Oxidation (M)[9]						Mascot
									ETFLKK
	3	Chain A, Human Serum Albumin Mutant R218p										gi|31615331		66369.9	5.62	26	721		100	569	100
		Complexed With Thyroxine
		(3,3',5,5'-Tetraiodo-L-Thyronine
		Peptide Information
		Calc. Mass		Obsrv. Mass	± da	± ppm	Start	End	Sequence			Ion	C. I. %	Modification					Rank	Result Type
							Seq.	Seq.				Score
		927.493	927.405		-0.088	-95	138	144	YLYEIAR											Mascot
		927.493	927.405		-0.088	-95	138	144	YLYEIAR			53	99.519							Mascot
		933.519	933.429		-0.09	-96	74	81	LCTVATLR					Carbamidomethyl (C)[2]						Mascot
		960.562	960.471		-0.0911	-95	403	410	FQNALLVR											Mascot
		960.562	960.471		-0.0911	-95	403	410	FQNALLVR			68	99.985							Mascot
		1074.54	1074.44		-0.0984	-92	182	190	LDELRDEGK											Mascot
		1149.58	1149.5		-0.0725	-63	1	10	DAHKSEVAHR											Mascot
		1149.62	1149.5		-0.1116	-97	42	51	LVNEVTEFAK			37	80.972							Mascot
		1226.61	1226.49		-0.1196	-98	11	20	FKDLGEENFK											Mascot
		1311.74	1311.62		-0.1241	-95	338	348	HPDYSVVLLLR											Mascot
		1358.63	1358.49		-0.1389	-102	546	557	AVMDDFAAFVEK					Oxidation (M)[3]						Mascot
		1358.63	1358.49		-0.1389	-102	546	557	AVMDDFAAFVEK			68	99.985	Oxidation (M)[3]						Mascot
		1450.53	1450.74		0.213	147	82	93	ETYGEMADCCAK					Carbamidomethyl (C)[9,10], Oxidation (M)[6]						Mascot
		1467.84	1467.7		-0.1415	-96	337	348	RHPDYSVVLLLR			87	100							Mascot
		1467.84	1467.7		-0.1415	-96	337	348	RHPDYSVVLLLR											Mascot
		1495.58	1495.56		-0.0153	-10	360	372	CCAAADPHECYAK					Carbamidomethyl (C)[1,2]						Mascot
		1511.84	1511.7		-0.1444	-96	415	428	VPQVSTPTLVEVSR											Mascot
		1627.8	1627.57		-0.2279	-140	263	276	YICENQDSISSKLK											Mascot
		1639.78	1639.63		-0.1543	-94	324	336	DVFLGMFLYEYAR					Oxidation (M)[6]						Mascot
		1639.78	1639.63		-0.1543	-94	324	336	DVFLGMFLYEYAR			14	0	Oxidation (M)[6]						Mascot
		1639.78	1639.78		-0.0009	-1	324	336	DVFLGMFLYEYAR					Oxidation (M)[6]						Mascot
		1657.75	1657.59		-0.1604	-97	390	402	QNCELFEQLGEYK					Carbamidomethyl (C)[3]						Mascot
		1714.8	1714.63		-0.1688	-98	94	106	QEPERNECFLQHK					Carbamidomethyl (C)[8]						Mascot
		1742.89	1742.72		-0.1773	-102	146	159	HPYFYAPELLFFAK											Mascot
		1899	1898.81		-0.1888	-99	146	160	HPYFYAPELLFFAKR											Mascot
		1910.93	1910.75		-0.1833	-96	485	500	RPCFSALEVDETYVPK			110	100	Carbamidomethyl (C)[3]						Mascot
		1910.93	1910.75		-0.1833	-96	485	500	RPCFSALEVDETYVPK					Carbamidomethyl (C)[3]						Mascot
		2045.1	2044.89		-0.2037	-100	373	389	VFDEFKPLVEEPQNLIK											Mascot
		2045.1	2044.89		-0.2037	-100	373	389	VFDEFKPLVEEPQNLIK			133	100							Mascot
		2193.96	2193.9		-0.0681	-31	74	93	LCTVATLRETYGEMADC					Oxidation (M)[14]						Mascot
									CAK
		2260.02	2259.8		-0.2222	-98	501	519	EFNAETFTFHADICTLSEK					Carbamidomethyl (C)[14]						Mascot
		2300.11	2299.93		-0.1722	-75	318	336	NYAEAKDVFLGMFLYEY											Mascot
									AR
		2545.17	2544.93		-0.2356	-93	501	521	EFNAETFTFHADICTLSEK					Carbamidomethyl (C)[14]						Mascot
									ER
		2794.35	2794.08		-0.2762	-99	115	137	LVRPEVDVMCTAFHDNE					Carbamidomethyl (C)[10], Oxidation (M)[9]						Mascot
									ETFLKK
	4	Chain A, Human Serum Albumin Complexed With										gi|122920512		66411.8	5.62	26	720		100	568	100
		Myristate And Aspirin
		Peptide Information
		Calc. Mass		Obsrv. Mass	± da	± ppm	Start	End	Sequence			Ion	C. I. %	Modification					Rank	Result Type
							Seq.	Seq.				Score
		927.493	927.405		-0.088	-95	138	144	YLYEIAR											Mascot
		927.493	927.405		-0.088	-95	138	144	YLYEIAR			53	99.519							Mascot
		933.519	933.429		-0.09	-96	74	81	LCTVATLR					Carbamidomethyl (C)[2]						Mascot
		960.562	960.471		-0.0911	-95	403	410	FQNALLVR											Mascot
		960.562	960.471		-0.0911	-95	403	410	FQNALLVR			68	99.985							Mascot
		1074.54	1074.44		-0.0984	-92	182	190	LDELRDEGK											Mascot
		1149.58	1149.5		-0.0725	-63	1	10	DAHKSEVAHR											Mascot
		1149.62	1149.5		-0.1116	-97	42	51	LVNEVTEFAK			37	80.972							Mascot
		1226.61	1226.49		-0.1196	-98	11	20	FKDLGEENFK											Mascot
		1311.74	1311.62		-0.1241	-95	338	348	HPDYSVVLLLR											Mascot
		1358.63	1358.49		-0.1389	-102	546	557	AVMDDFAAFVEK					Oxidation (M)[3]						Mascot
		1358.63	1358.49		-0.1389	-102	546	557	AVMDDFAAFVEK			68	99.985	Oxidation (M)[3]						Mascot
		1450.53	1450.74		0.213	147	82	93	ETYGEMADCCAK					Carbamidomethyl (C)[9,10], Oxidation (M)[6]						Mascot
		1467.84	1467.7		-0.1415	-96	337	348	RHPDYSVVLLLR			87	100							Mascot
		1467.84	1467.7		-0.1415	-96	337	348	RHPDYSVVLLLR											Mascot
		1495.58	1495.56		-0.0153	-10	360	372	CCAAADPHECYAK					Carbamidomethyl (C)[1,2]						Mascot
		1511.84	1511.7		-0.1444	-96	415	428	VPQVSTPTLVEVSR											Mascot
		1627.8	1627.57		-0.2279	-140	263	276	YICENQDSISSKLK											Mascot
		1639.78	1639.63		-0.1543	-94	324	336	DVFLGMFLYEYAR					Oxidation (M)[6]						Mascot
		1639.78	1639.63		-0.1543	-94	324	336	DVFLGMFLYEYAR			14	0	Oxidation (M)[6]						Mascot
		1639.78	1639.78		-0.0009	-1	324	336	DVFLGMFLYEYAR					Oxidation (M)[6]						Mascot
		1657.75	1657.59		-0.1604	-97	390	402	QNCELFEQLGEYK					Carbamidomethyl (C)[3]						Mascot
		1714.8	1714.63		-0.1688	-98	94	106	QEPERNECFLQHK					Carbamidomethyl (C)[8]						Mascot
		1742.89	1742.72		-0.1773	-102	146	159	HPYFYAPELLFFAK											Mascot
		1899	1898.81		-0.1888	-99	146	160	HPYFYAPELLFFAKR											Mascot
		1910.93	1910.75		-0.1833	-96	485	500	RPCFSALEVDETYVPK			110	100	Carbamidomethyl (C)[3]						Mascot
		1910.93	1910.75		-0.1833	-96	485	500	RPCFSALEVDETYVPK					Carbamidomethyl (C)[3]						Mascot
		2045.1	2044.89		-0.2037	-100	373	389	VFDEFKPLVEEPQNLIK											Mascot
		2045.1	2044.89		-0.2037	-100	373	389	VFDEFKPLVEEPQNLIK			133	100							Mascot
		2193.96	2193.9		-0.0681	-31	74	93	LCTVATLRETYGEMADC					Oxidation (M)[14]						Mascot
									CAK
		2260.02	2259.8		-0.2222	-98	501	519	EFNAETFTFHADICTLSEK					Carbamidomethyl (C)[14]						Mascot
		2300.11	2299.93		-0.1722	-75	318	336	NYAEAKDVFLGMFLYEY											Mascot
									AR
		2545.17	2544.93		-0.2356	-93	501	521	EFNAETFTFHADICTLSEK					Carbamidomethyl (C)[14]						Mascot
									ER
		2794.35	2794.08		-0.2762	-99	115	137	LVRPEVDVMCTAFHDNE					Carbamidomethyl (C)[10], Oxidation (M)[9]						Mascot
									ETFLKK
	5	alloalbumin Venezia [Homo sapiens]										gi|178345		69181.4	5.99	27	718		100	567	100
		Peptide Information
		Calc. Mass		Obsrv. Mass	± da	± ppm	Start	End	Sequence			Ion	C. I. %	Modification					Rank	Result Type
							Seq.	Seq.				Score
		927.493	927.405		-0.088	-95	162	168	YLYEIAR											Mascot
		927.493	927.405		-0.088	-95	162	168	YLYEIAR			53	99.519							Mascot
		933.519	933.429		-0.09	-96	98	105	LCTVATLR					Carbamidomethyl (C)[2]						Mascot
		960.562	960.471		-0.0911	-95	427	434	FQNALLVR											Mascot
		960.562	960.471		-0.0911	-95	427	434	FQNALLVR			68	99.985							Mascot
		1074.54	1074.44		-0.0984	-92	206	214	LDELRDEGK											Mascot
		1149.58	1149.5		-0.0725	-63	25	34	DAHKSEVAHR											Mascot
		1149.62	1149.5		-0.1116	-97	66	75	LVNEVTEFAK			37	80.972							Mascot
		1226.61	1226.49		-0.1196	-98	35	44	FKDLGEENFK											Mascot
		1311.74	1311.62		-0.1241	-95	362	372	HPDYSVVLLLR											Mascot
		1358.63	1358.49		-0.1389	-102	570	581	AVMDDFAAFVEK					Oxidation (M)[3]						Mascot
		1358.63	1358.49		-0.1389	-102	570	581	AVMDDFAAFVEK			68	99.985	Oxidation (M)[3]						Mascot
		1450.53	1450.74		0.213	147	106	117	ETYGEMADCCAK					Carbamidomethyl (C)[9,10], Oxidation (M)[6]						Mascot
		1467.84	1467.7		-0.1415	-96	361	372	RHPDYSVVLLLR			87	100							Mascot
		1467.84	1467.7		-0.1415	-96	361	372	RHPDYSVVLLLR											Mascot
		1495.58	1495.56		-0.0153	-10	384	396	CCAAADPHECYAK					Carbamidomethyl (C)[1,2]						Mascot
		1511.84	1511.7		-0.1444	-96	439	452	VPQVSTPTLVEVSR											Mascot
		1627.8	1627.57		-0.2279	-140	287	300	YICENQDSISSKLK											Mascot
		1639.76	1639.63		-0.1285	-78	589	601	ETCFAEEPTMRIR					Carbamidomethyl (C)[3]						Mascot
		1639.78	1639.63		-0.1543	-94	348	360	DVFLGMFLYEYAR			14	0	Oxidation (M)[6]						Mascot
		1639.78	1639.78		-0.0009	-1	348	360	DVFLGMFLYEYAR					Oxidation (M)[6]						Mascot
		1655.75	1655.63		-0.1259	-76	589	601	ETCFAEEPTMRIR					Carbamidomethyl (C)[3], Oxidation (M)[10]						Mascot
		1657.75	1657.59		-0.1604	-97	414	426	QNCELFEQLGEYK					Carbamidomethyl (C)[3]						Mascot
		1714.8	1714.63		-0.1688	-98	118	130	QEPERNECFLQHK					Carbamidomethyl (C)[8]						Mascot
		1742.74	1742.72		-0.0194	-11	585	599	ADDKETCFAEEPTMR											Mascot
		1899	1898.81		-0.1888	-99	170	184	HPYFYAPELLFFAKR											Mascot
		1910.93	1910.75		-0.1833	-96	509	524	RPCFSALEVDETYVPK			110	100	Carbamidomethyl (C)[3]						Mascot
		1910.93	1910.75		-0.1833	-96	509	524	RPCFSALEVDETYVPK					Carbamidomethyl (C)[3]						Mascot
		2045.1	2044.89		-0.2037	-100	397	413	VFDEFKPLVEEPQNLIK											Mascot
		2045.1	2044.89		-0.2037	-100	397	413	VFDEFKPLVEEPQNLIK			133	100							Mascot
		2193.96	2193.9		-0.0681	-31	98	117	LCTVATLRETYGEMADC					Oxidation (M)[14]						Mascot
									CAK
		2260.02	2259.8		-0.2222	-98	525	543	EFNAETFTFHADICTLSEK					Carbamidomethyl (C)[14]						Mascot
		2300.11	2299.93		-0.1722	-75	342	360	NYAEAKDVFLGMFLYEY											Mascot
									AR
		2545.17	2544.93		-0.2356	-93	525	545	EFNAETFTFHADICTLSEK					Carbamidomethyl (C)[14]						Mascot
									ER
		2794.35	2794.08		-0.2762	-99	139	161	LVRPEVDVMCTAFHDNE					Carbamidomethyl (C)[10], Oxidation (M)[9]						Mascot
									ETFLKK
	6	Chain A, Crystal Structure Of Human Serum Albumin										gi|228311905		66129.8	5.73	25	717		100	570	100
		Complexed With Myristic Acid And Lysophosphatidyl
		Peptide Information
		Calc. Mass		Obsrv. Mass	± da	± ppm	Start	End	Sequence			Ion	C. I. %	Modification					Rank	Result Type
							Seq.	Seq.				Score
		927.493	927.405		-0.088	-95	136	142	YLYEIAR											Mascot
		927.493	927.405		-0.088	-95	136	142	YLYEIAR			53	99.519							Mascot
		933.519	933.429		-0.09	-96	72	79	LCTVATLR					Carbamidomethyl (C)[2]						Mascot
		960.562	960.471		-0.0911	-95	401	408	FQNALLVR											Mascot
		960.562	960.471		-0.0911	-95	401	408	FQNALLVR			68	99.985							Mascot
		1074.54	1074.44		-0.0984	-92	180	188	LDELRDEGK											Mascot
		1149.62	1149.5		-0.1116	-97	40	49	LVNEVTEFAK											Mascot
		1149.62	1149.5		-0.1116	-97	40	49	LVNEVTEFAK			37	80.972							Mascot
		1226.61	1226.49		-0.1196	-98	9	18	FKDLGEENFK											Mascot
		1311.74	1311.62		-0.1241	-95	336	346	HPDYSVVLLLR											Mascot
		1358.63	1358.49		-0.1389	-102	544	555	AVMDDFAAFVEK					Oxidation (M)[3]						Mascot
		1358.63	1358.49		-0.1389	-102	544	555	AVMDDFAAFVEK			68	99.985	Oxidation (M)[3]						Mascot
		1450.53	1450.74		0.213	147	80	91	ETYGEMADCCAK					Carbamidomethyl (C)[9,10], Oxidation (M)[6]						Mascot
		1467.84	1467.7		-0.1415	-96	335	346	RHPDYSVVLLLR			87	100							Mascot
		1467.84	1467.7		-0.1415	-96	335	346	RHPDYSVVLLLR											Mascot
		1495.58	1495.56		-0.0153	-10	358	370	CCAAADPHECYAK					Carbamidomethyl (C)[1,2]						Mascot
		1511.84	1511.7		-0.1444	-96	413	426	VPQVSTPTLVEVSR											Mascot
		1627.8	1627.57		-0.2279	-140	261	274	YICENQDSISSKLK											Mascot
		1639.78	1639.63		-0.1543	-94	322	334	DVFLGMFLYEYAR					Oxidation (M)[6]						Mascot
		1639.78	1639.63		-0.1543	-94	322	334	DVFLGMFLYEYAR			14	0	Oxidation (M)[6]						Mascot
		1639.78	1639.78	1639.78	-0.0009	-1	322	334	DVFLGMFLYEYAR					Oxidation (M)[6]						Mascot	Mascot
		1657.75	1657.59		-0.1604	-97	388	400	QNCELFEQLGEYK					Carbamidomethyl (C)[3]						Mascot
		1714.8	1714.63		-0.1688	-98	92	104	QEPERNECFLQHK					Carbamidomethyl (C)[8]						Mascot
		1742.89	1742.72		-0.1773	-102	144	157	HPYFYAPELLFFAK											Mascot
		1899	1898.81		-0.1888	-99	144	158	HPYFYAPELLFFAKR											Mascot
		1910.93	1910.75		-0.1833	-96	483	498	RPCFSALEVDETYVPK			110	100	Carbamidomethyl (C)[3]						Mascot
		1910.93	1910.75		-0.1833	-96	483	498	RPCFSALEVDETYVPK					Carbamidomethyl (C)[3]						Mascot
		2045.1	2044.89		-0.2037	-100	371	387	VFDEFKPLVEEPQNLIK											Mascot
		2045.1	2044.89		-0.2037	-100	371	387	VFDEFKPLVEEPQNLIK			133	100							Mascot
		2193.96	2193.9		-0.0681	-31	72	91	LCTVATLRETYGEMADC					Oxidation (M)[14]						Mascot
									CAK
		2260.02	2259.8		-0.2222	-98	499	517	EFNAETFTFHADICTLSEK					Carbamidomethyl (C)[14]						Mascot
		2300.11	2299.93		-0.1722	-75	316	334	NYAEAKDVFLGMFLYEY											Mascot
									AR
		2545.17	2544.93		-0.2356	-93	499	519	EFNAETFTFHADICTLSEK					Carbamidomethyl (C)[14]						Mascot
									ER
		2794.35	2794.08		-0.2762	-99	113	135	LVRPEVDVMCTAFHDNE					Carbamidomethyl (C)[10], Oxidation (M)[9]						Mascot
									ETFLKK
	7	Chain A, Human Serum Albumin In A Complex With										gi|157830361		65992.7	5.69	25	716		100	570	100
		Myristic Acid And Tri- Iodobenzoic Acid
		Peptide Information
		Calc. Mass		Obsrv. Mass	± da	± ppm	Start	End	Sequence			Ion	C. I. %	Modification					Rank	Result Type
							Seq.	Seq.				Score
		927.493	927.405		-0.088	-95	135	141	YLYEIAR											Mascot
		927.493	927.405		-0.088	-95	135	141	YLYEIAR			53	99.519							Mascot
		933.519	933.429		-0.09	-96	71	78	LCTVATLR					Carbamidomethyl (C)[2]						Mascot
[truncated: 6,715 more rows]
[truncated: 1 more columns]
